# Supplementary material for: Assessment of the antioxidant and antibacterial activities of different olive processing wastewaters
Source: PubMed Central journal article supplement (PMC5584791; doi:10.1371/journal.pone.0182622), 2017-09-05

### S3 File. HPLC and MS chromatogram of OMW samples.

SI\_hydroxytyrosol (area=23514.1)

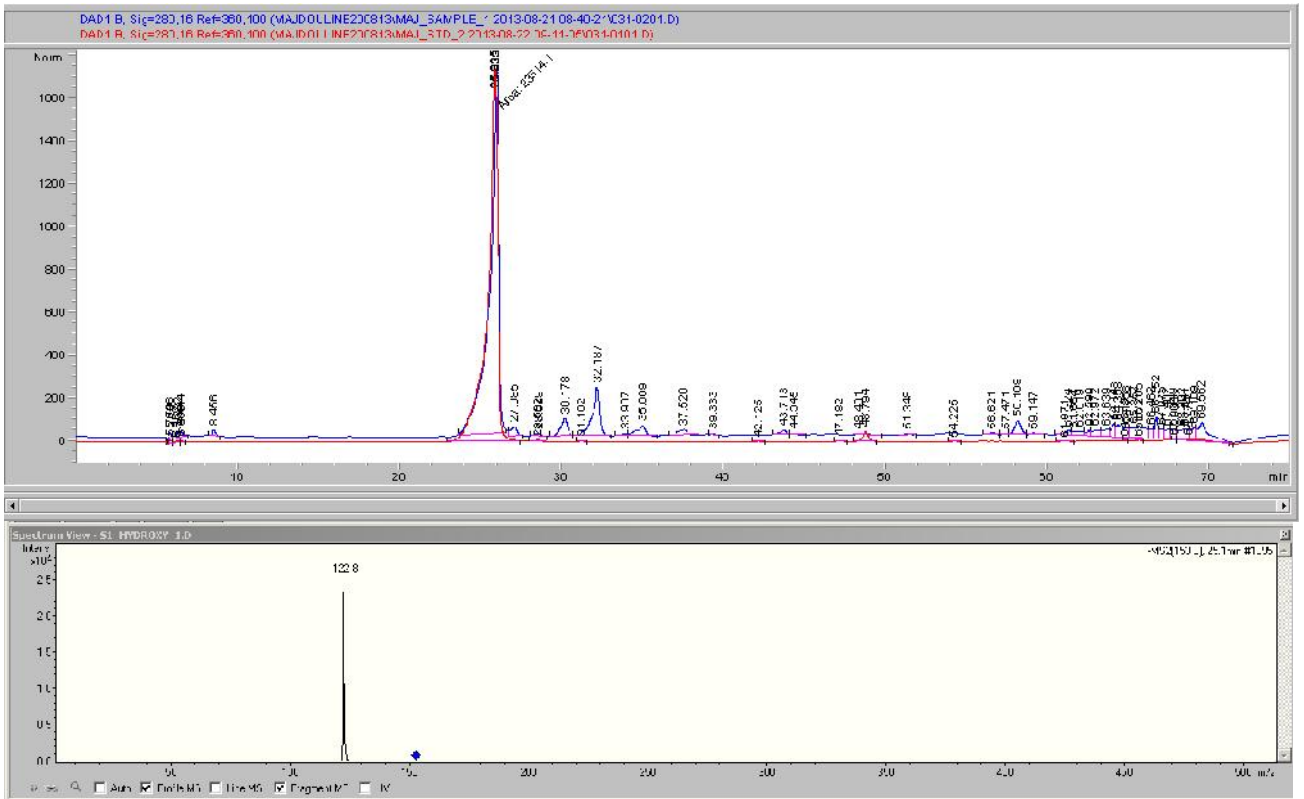

S1\_Tyrosol (area=2351.81)

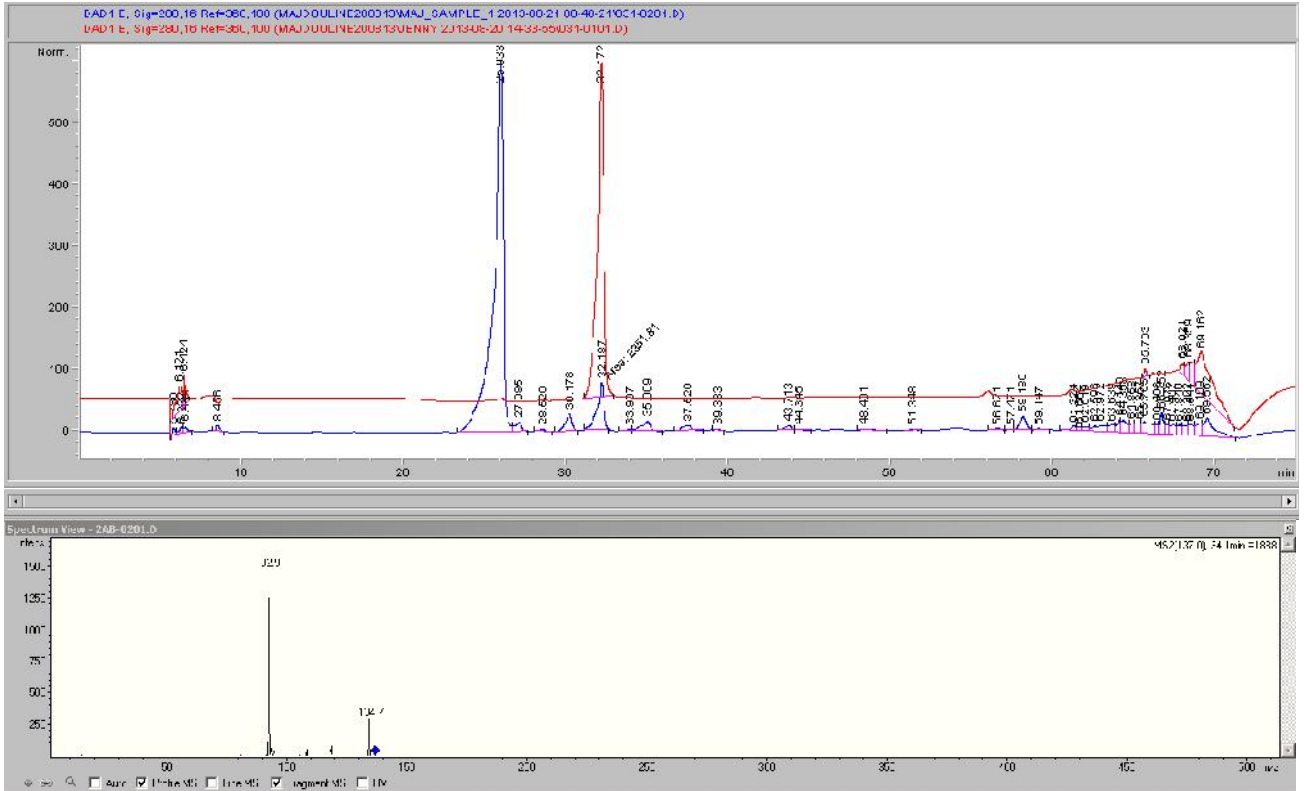

### S1\_Oleuropein (area=562.312)

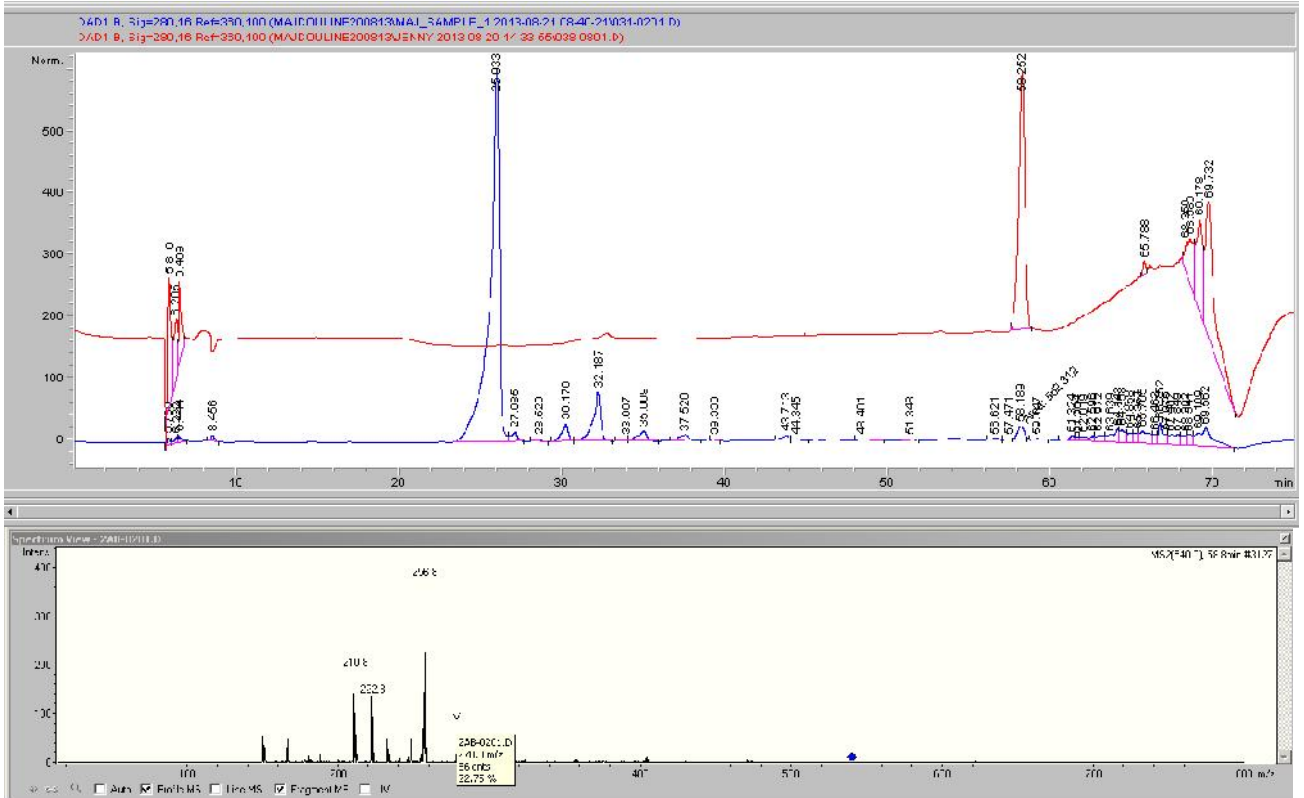

### S2\_Hydroxytyrosol (area=4024.34)

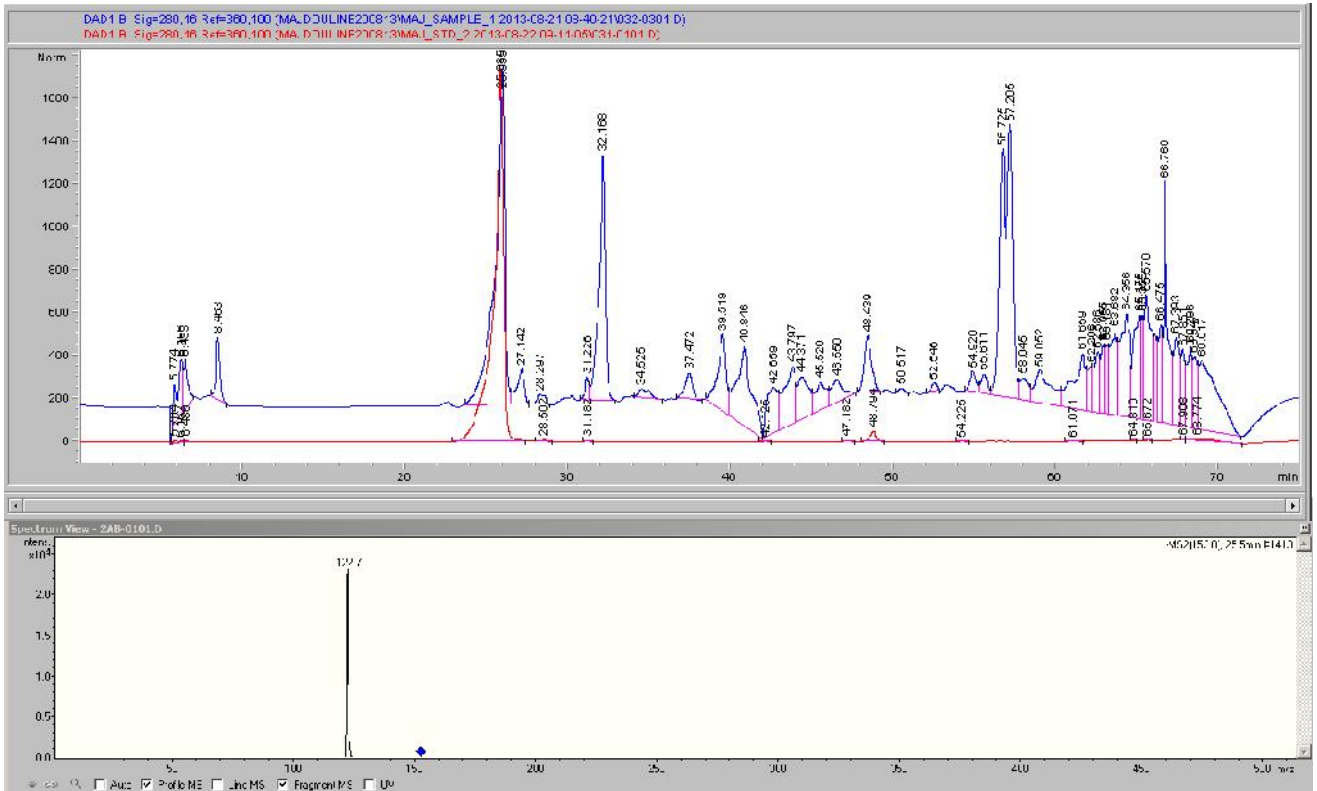

### S2\_Tyrosol (area=1999.67)

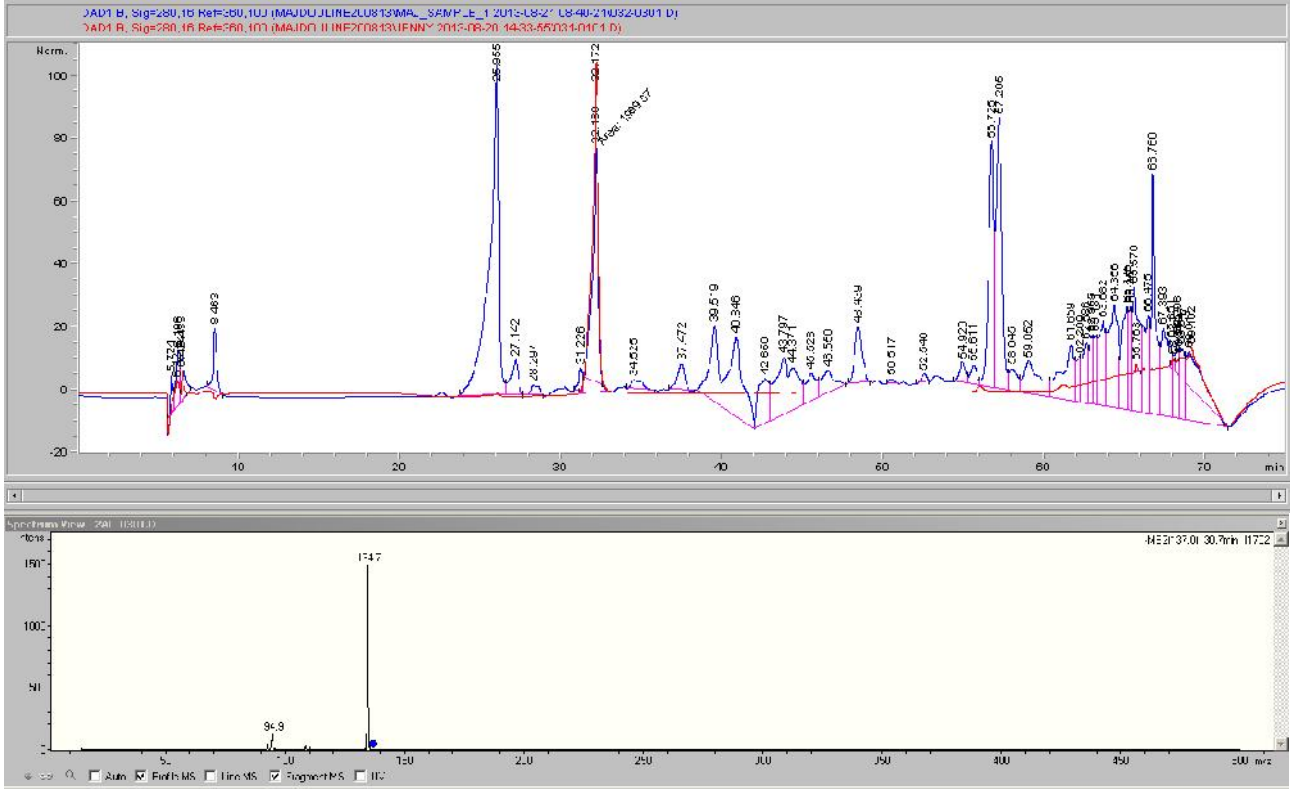

S2\_Oleuropein (area=81.8678)

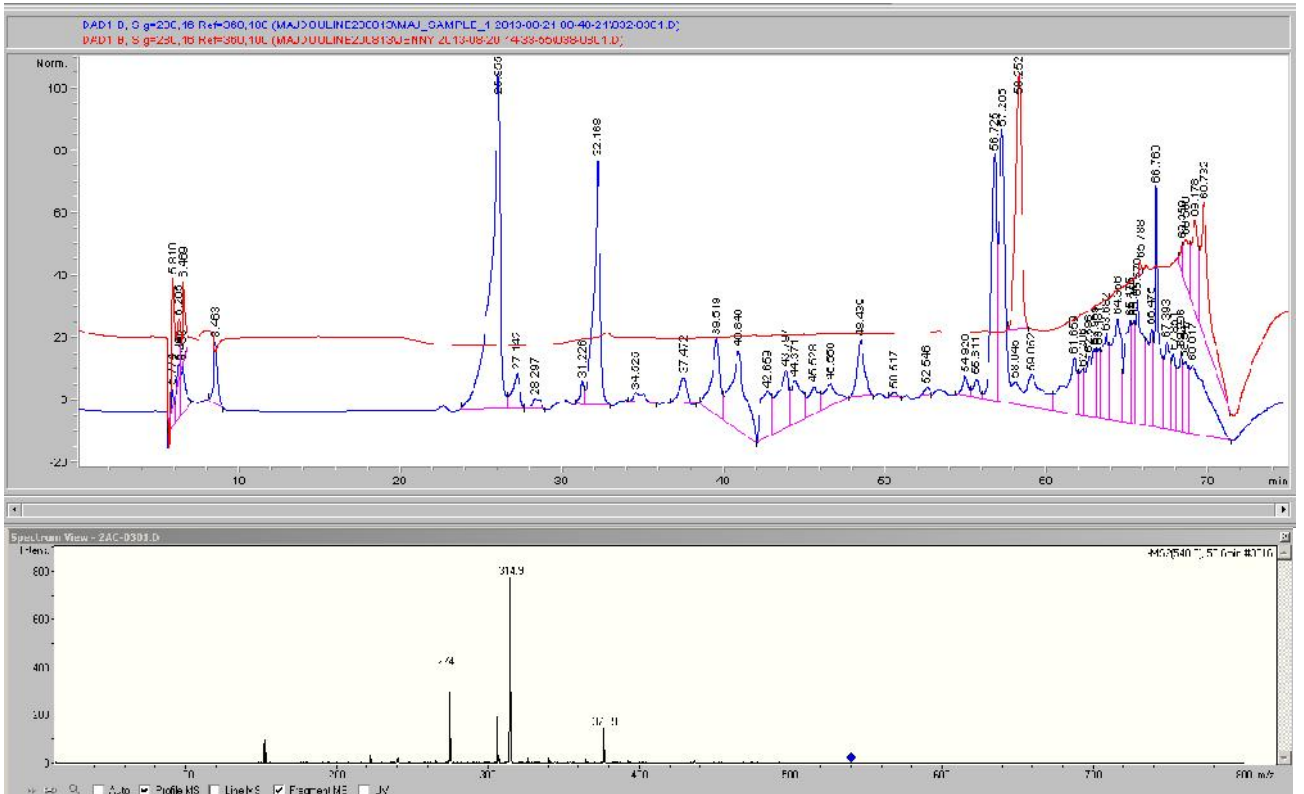

S2\_P-coumaric (area= 500.266)

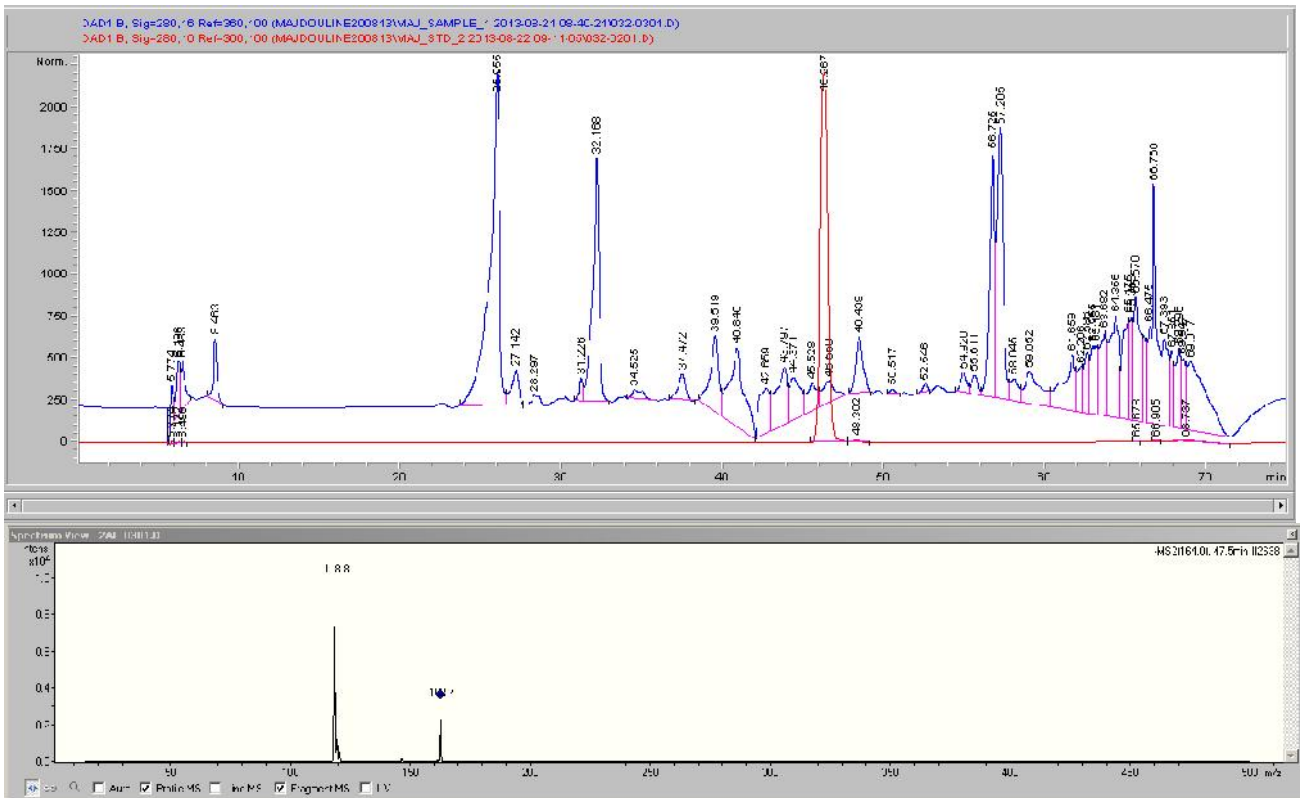

S3\_hydroxytyrosol (area=15222.8)

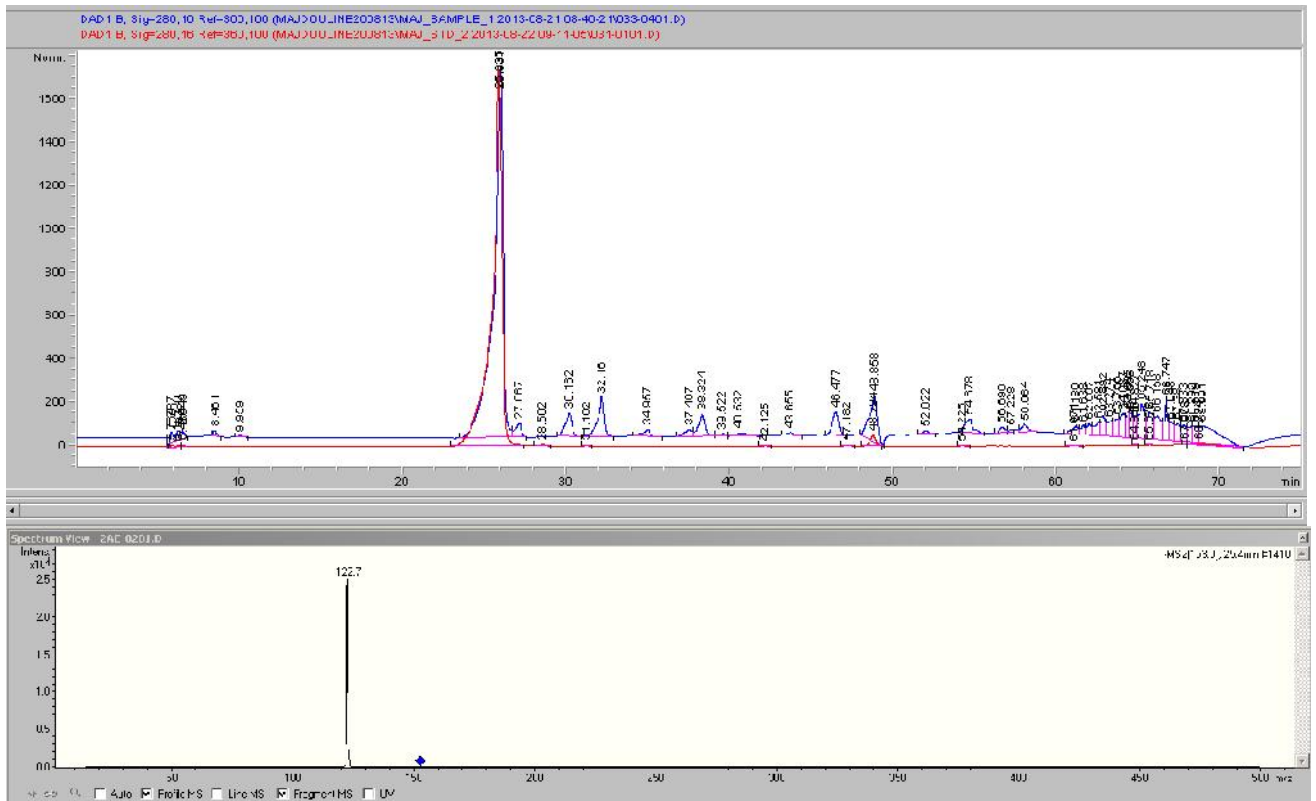

S3\_Ferrulic acid (area=1855.89, 131.663)

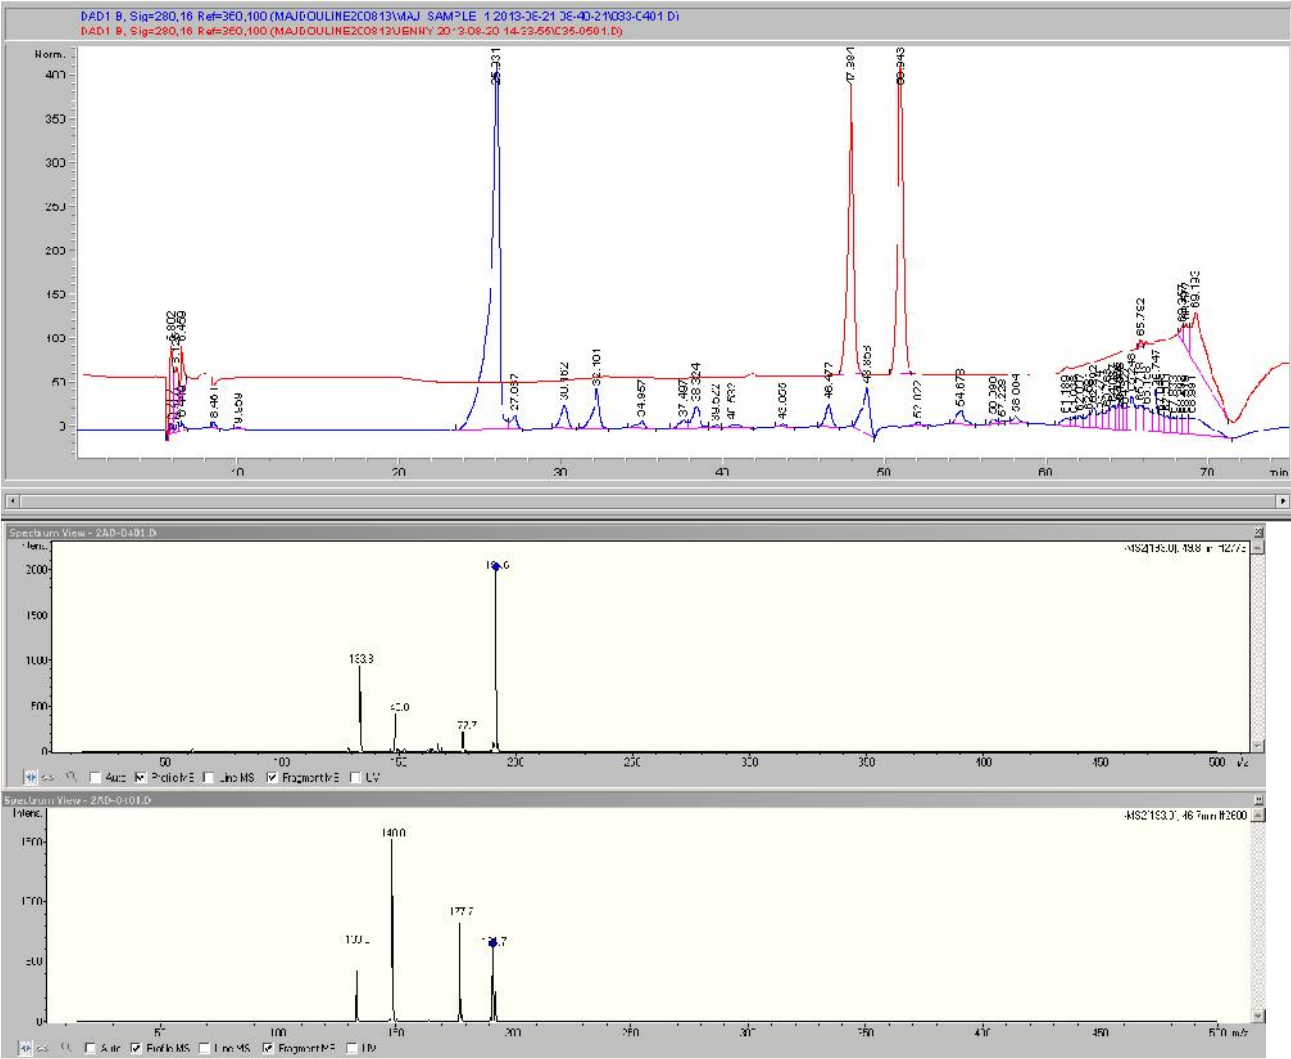

S3\_Oleuropein (area=132.767)







S4\_P-coumaric acid (area=251.832)

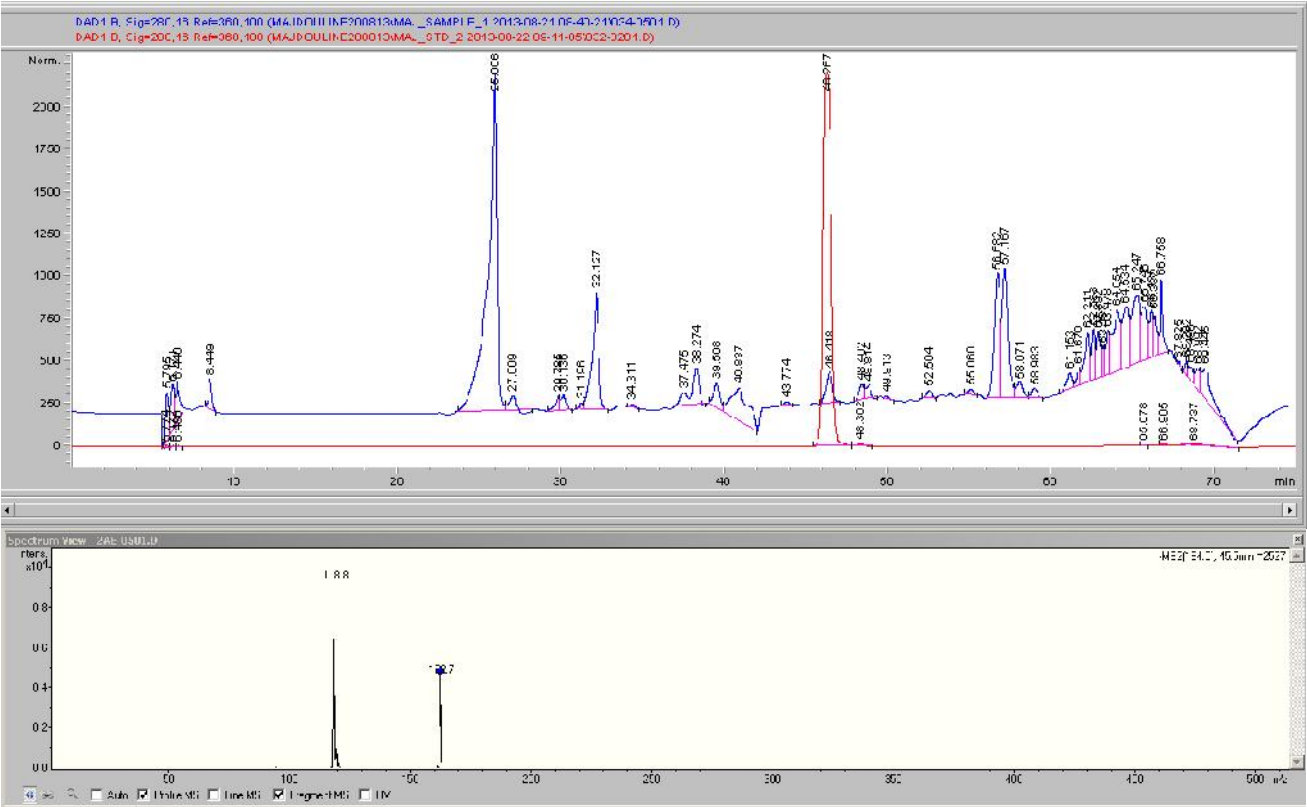

S4\_Ferrulic acid (area=257.220, 36.74)

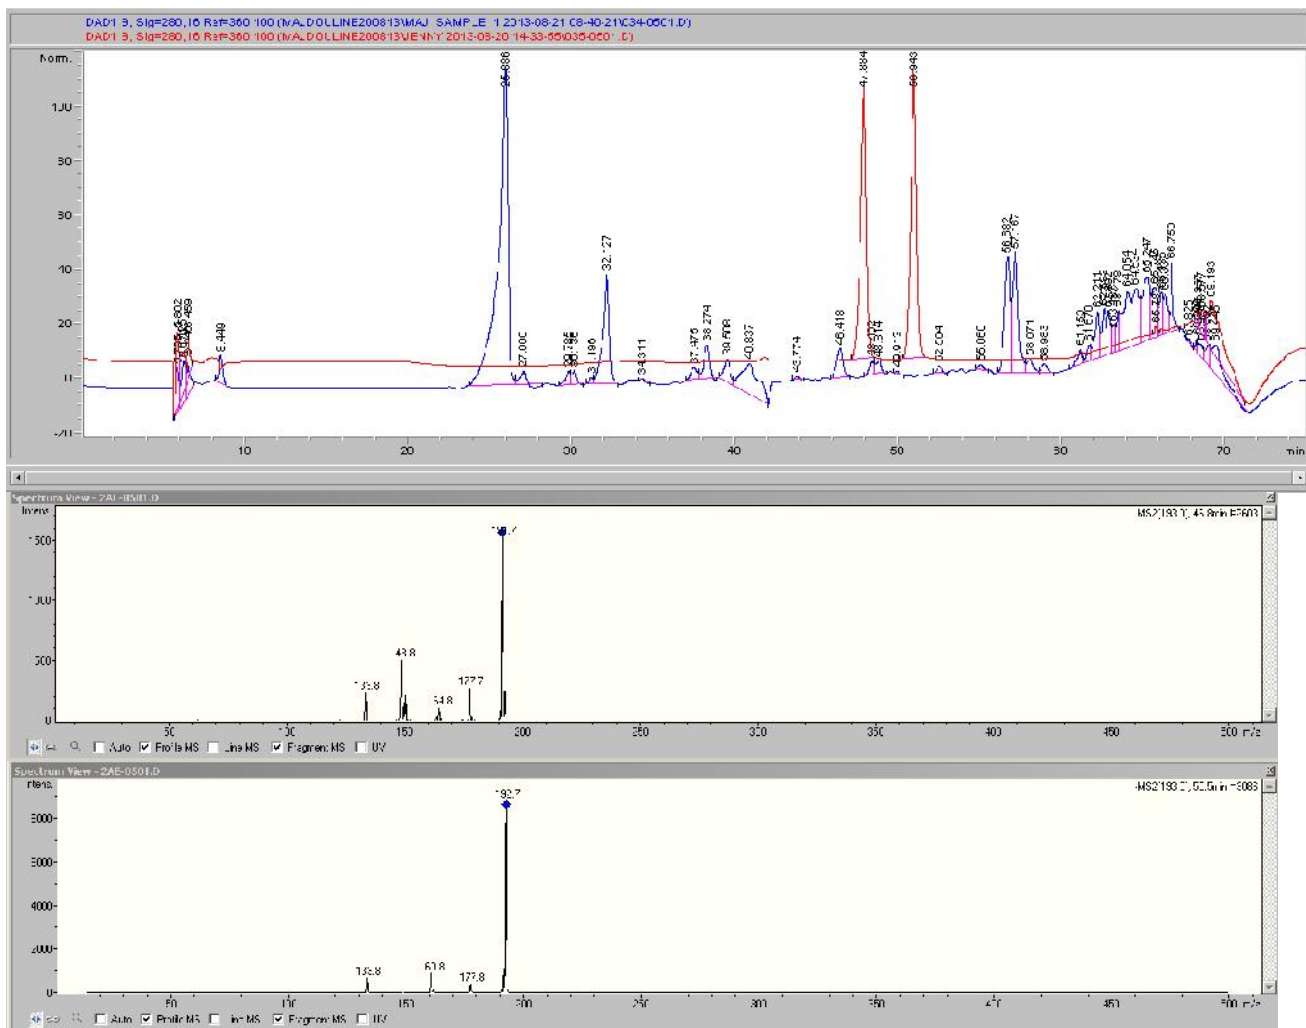

S4\_Oleuropein (area=51.121)

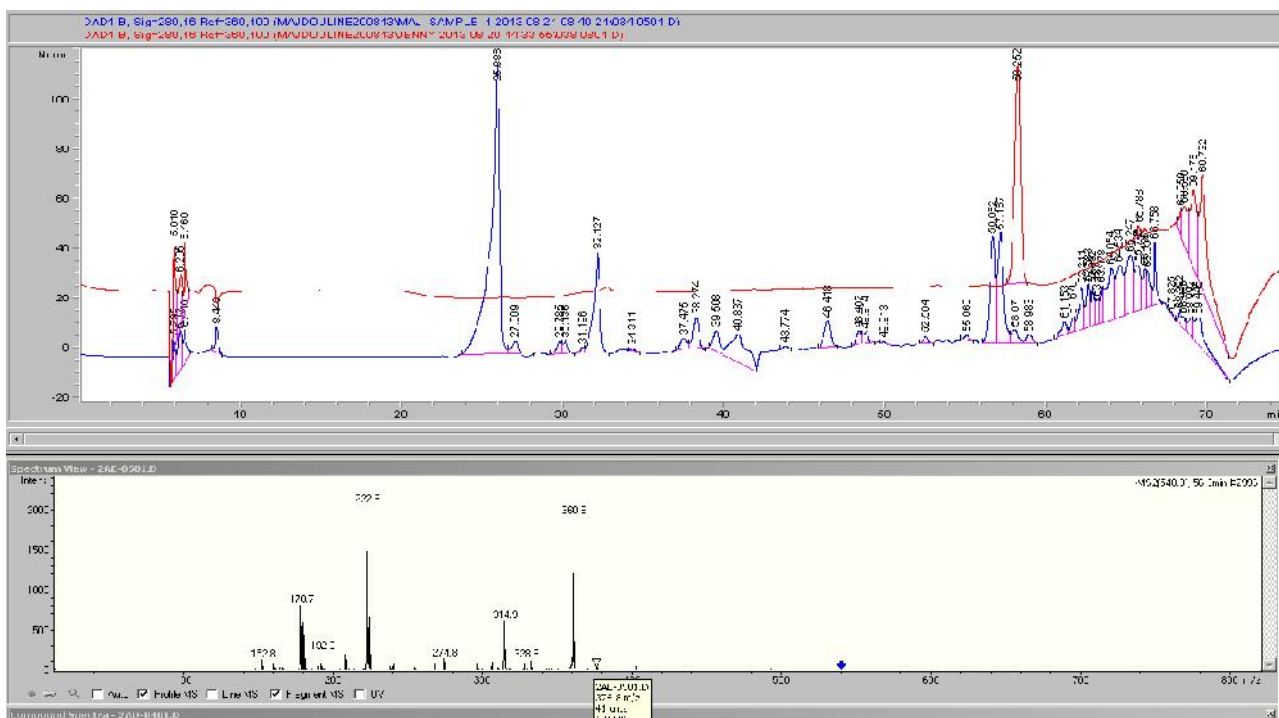

### V\_hydroxytyrosol (area=74211.3)

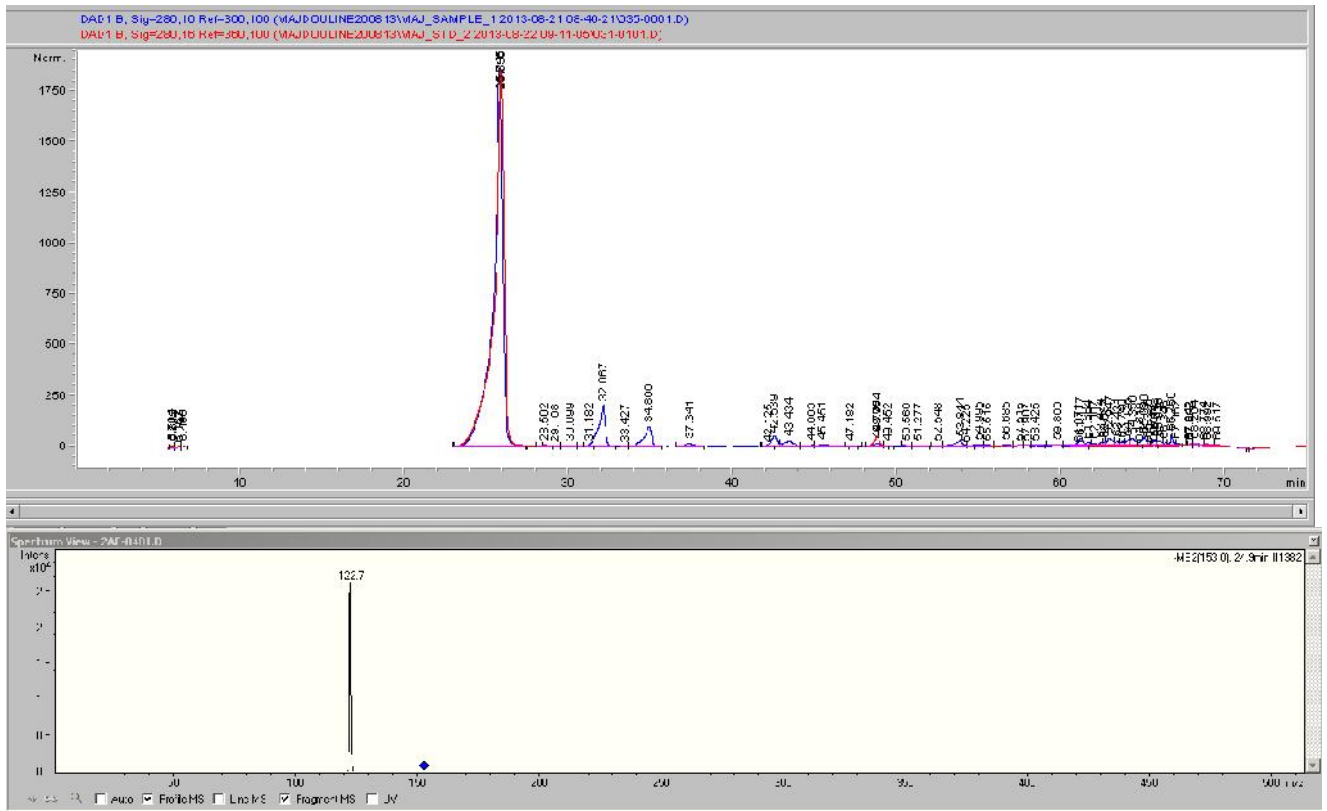

### V\_Tyrosol (area=5939.05)

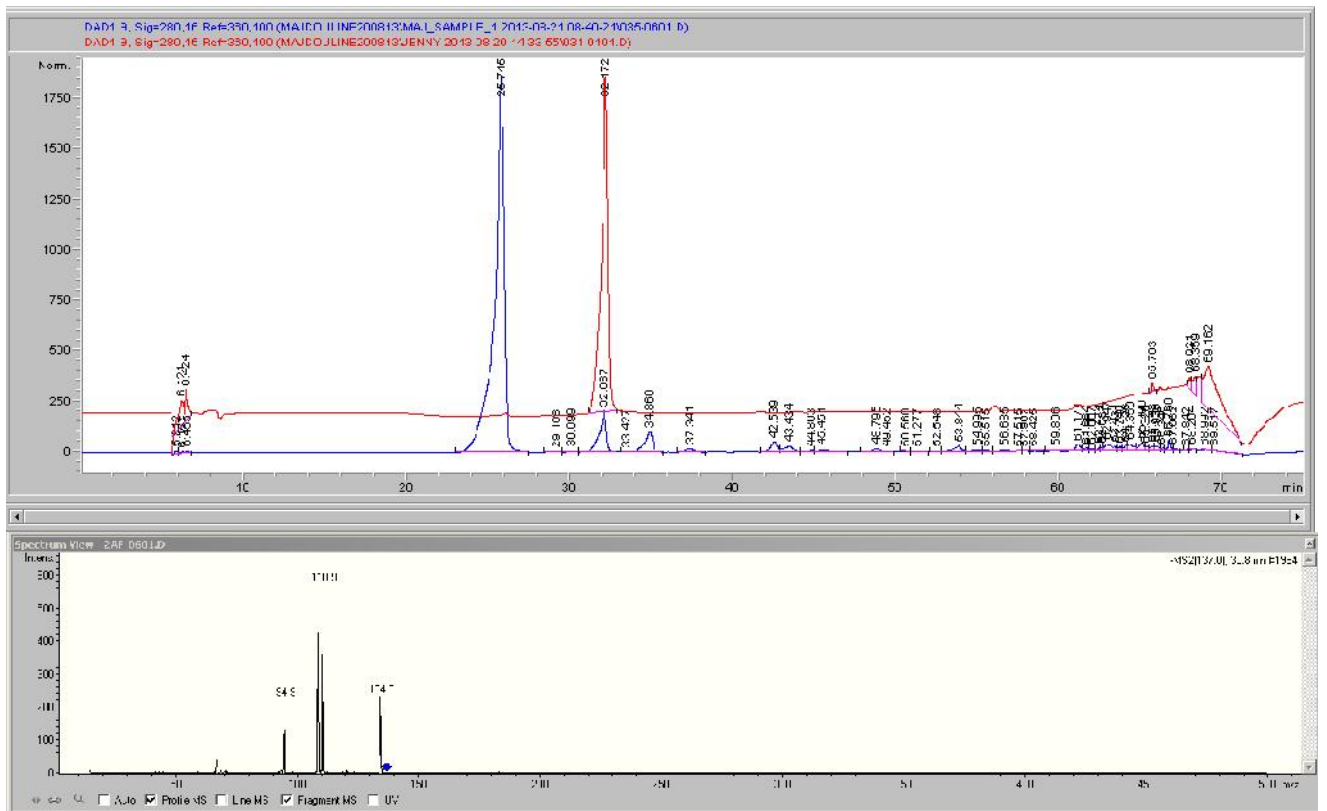

V\_oleuropein (area=23.75)

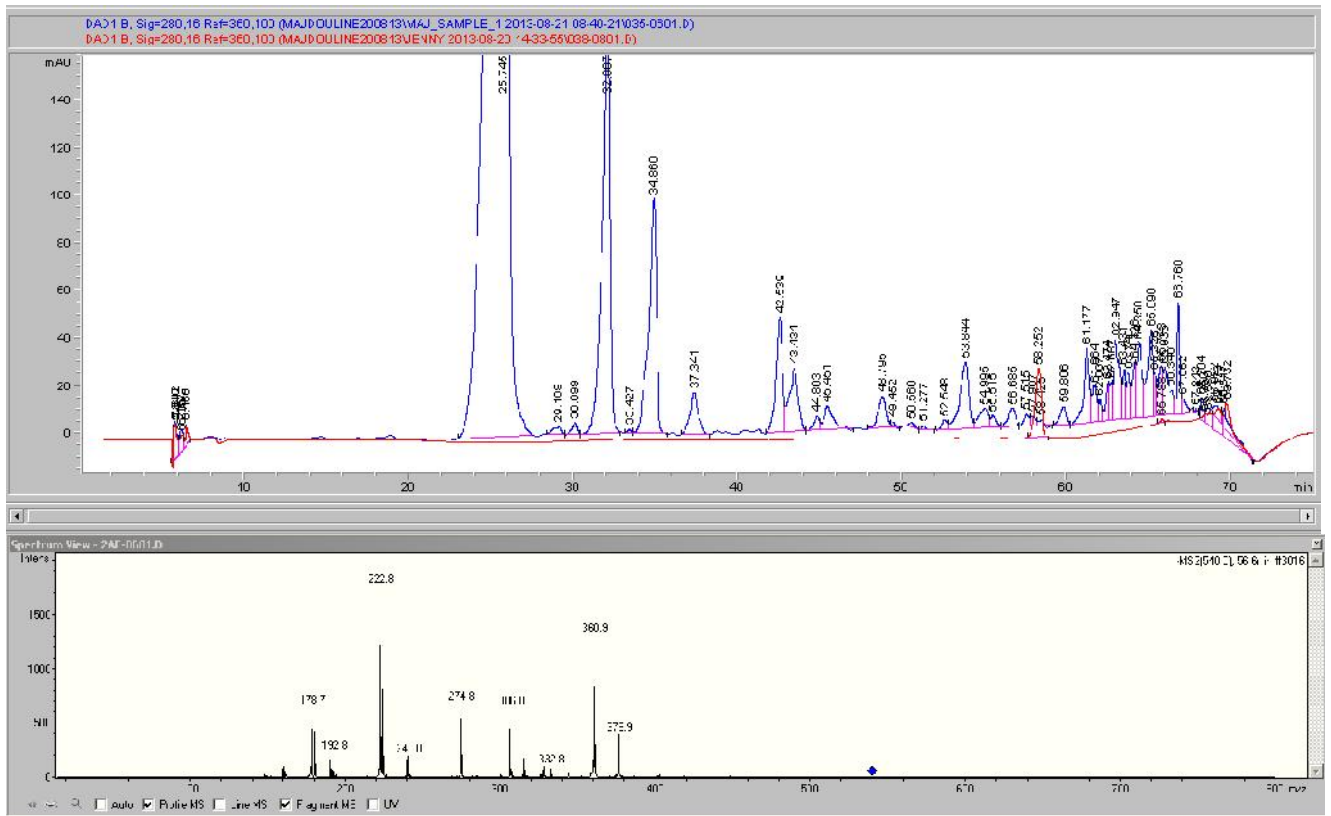

T\_Hydroxytyrosol (area=43125.4)

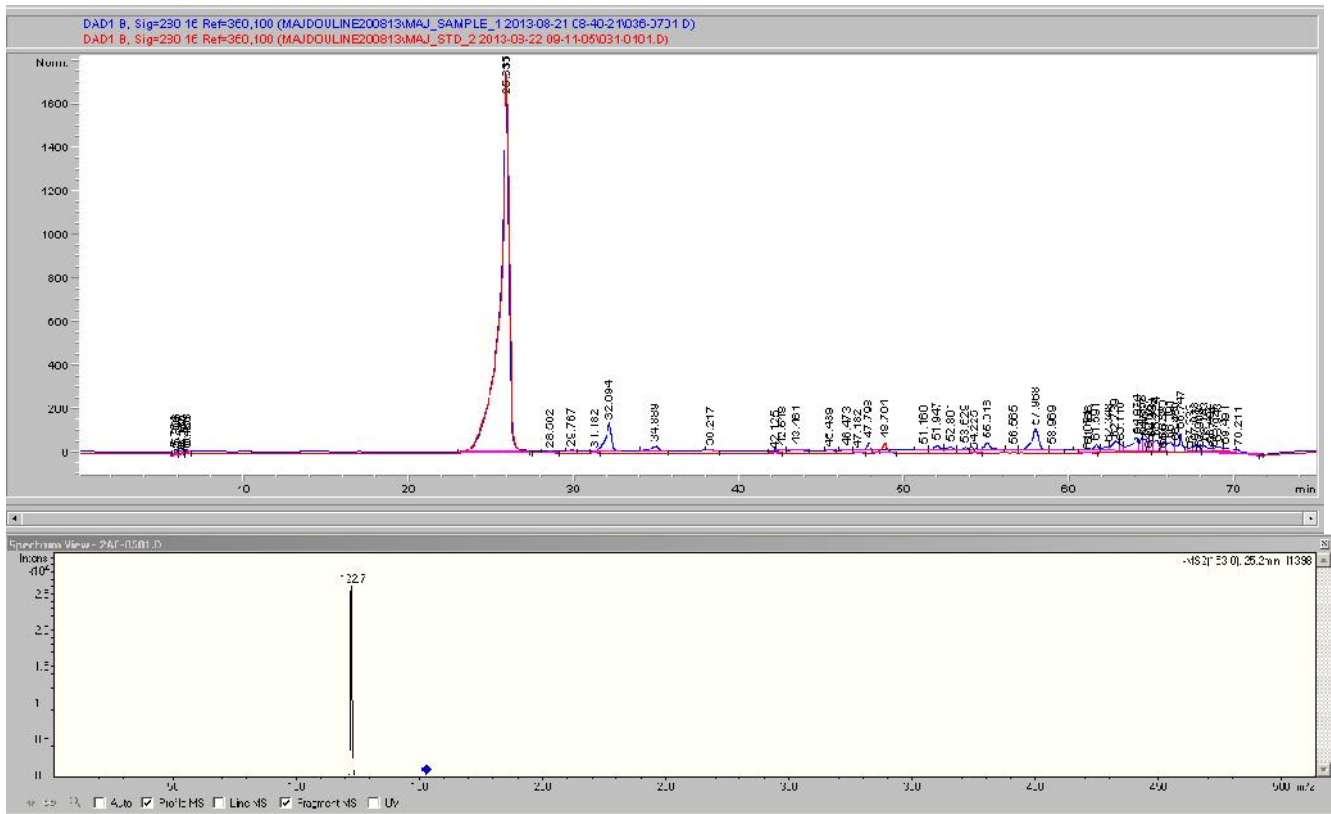

### T\_Tyrosol (area=2208.98)

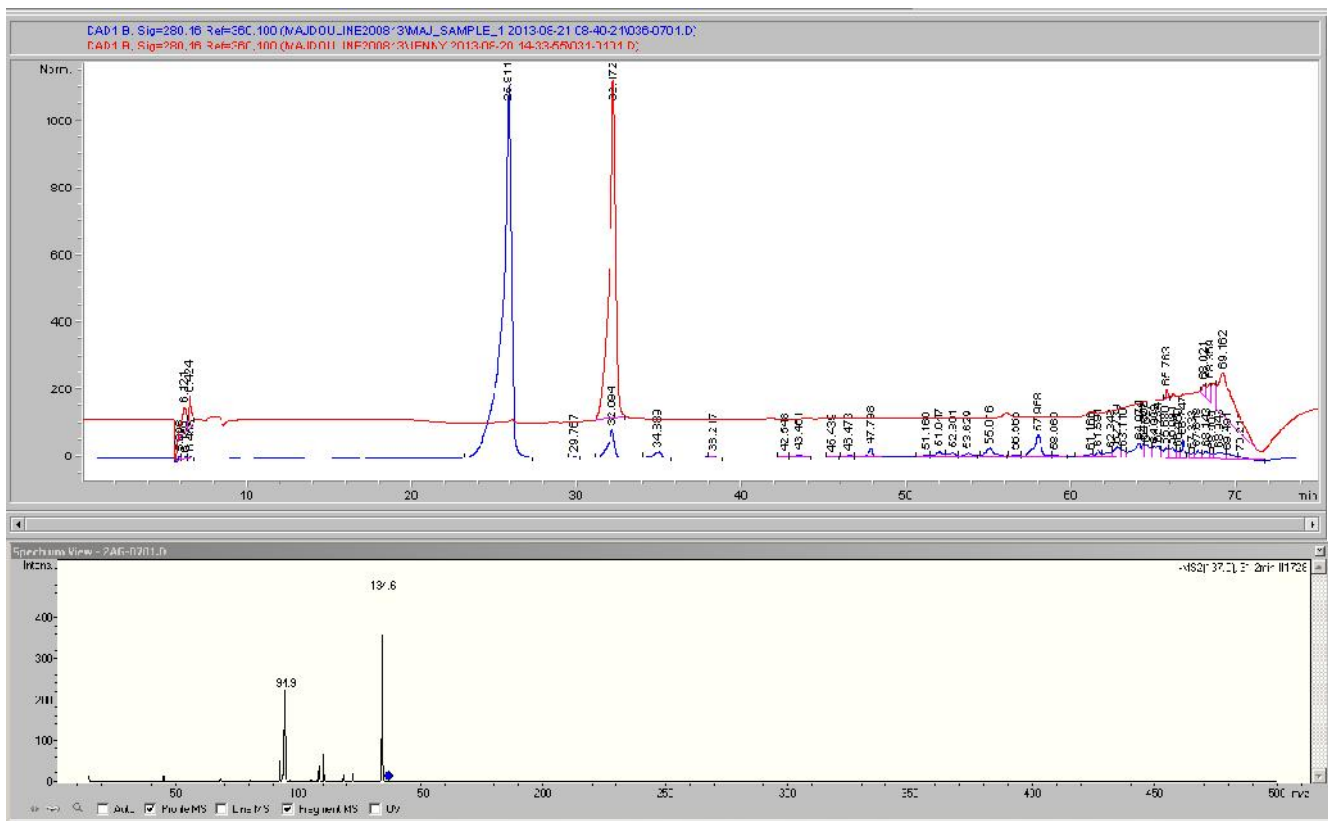

### T\_Oleuropein (area=1750.8)

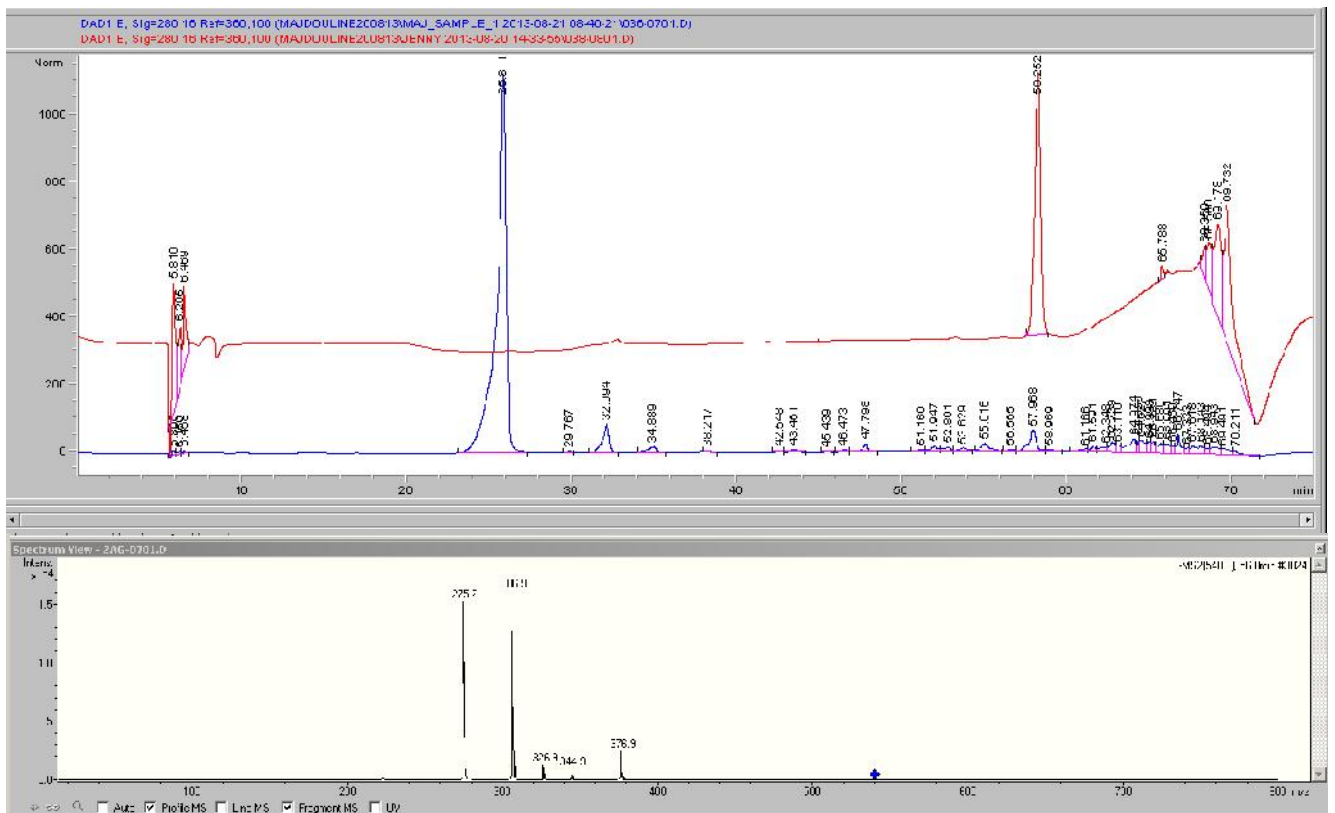

T\_P-coumaric acid (area=282.313)

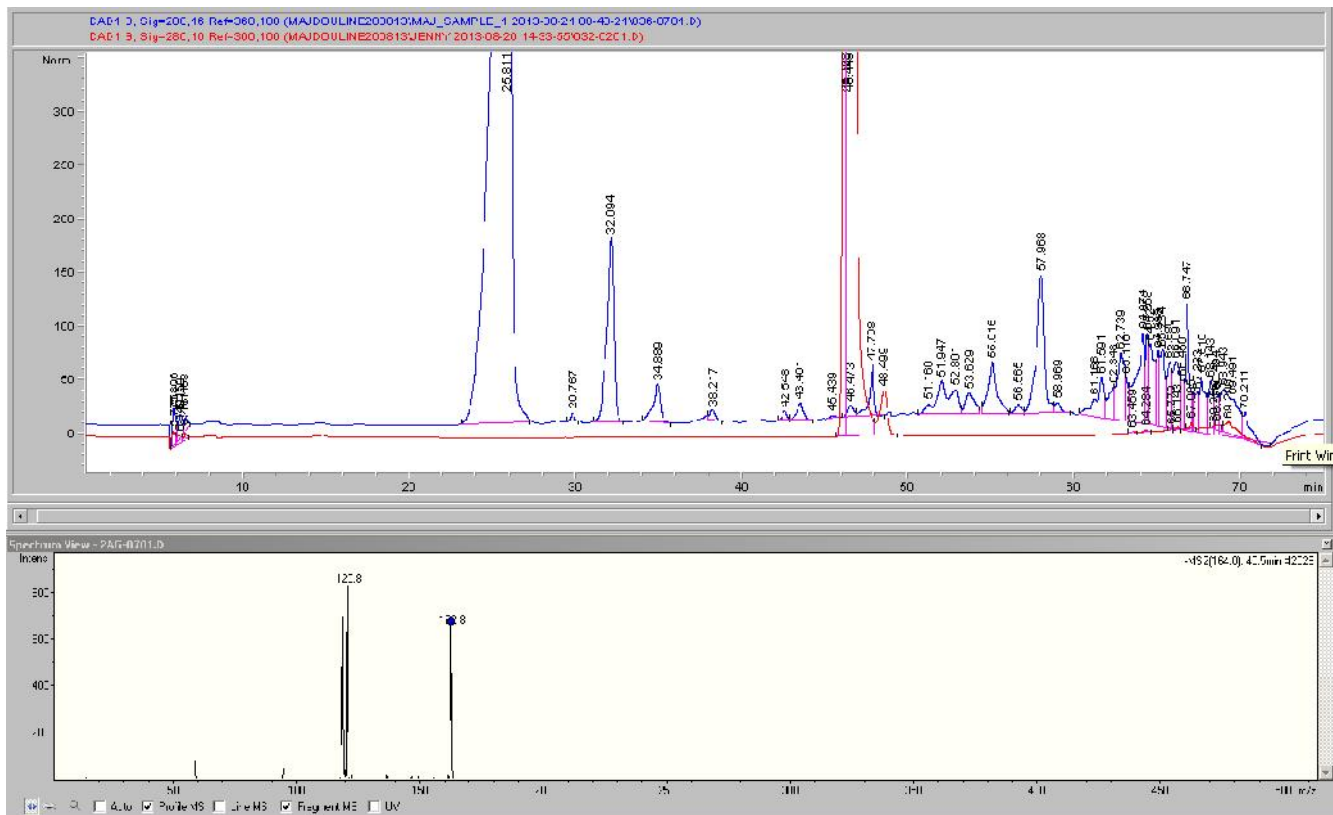

N\_Hydroxytyrosol (area=9663.47)

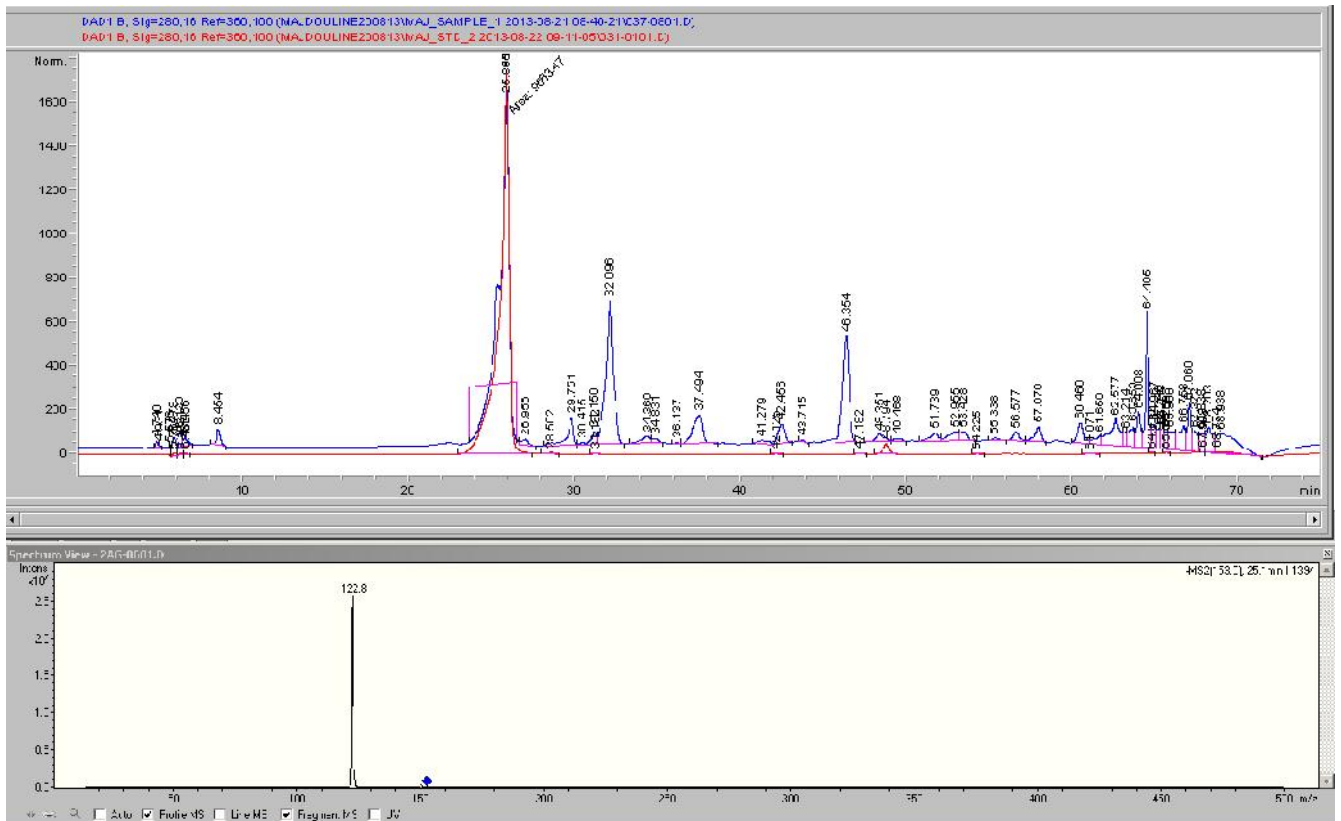

N\_Tyrosol (area=4410.57)

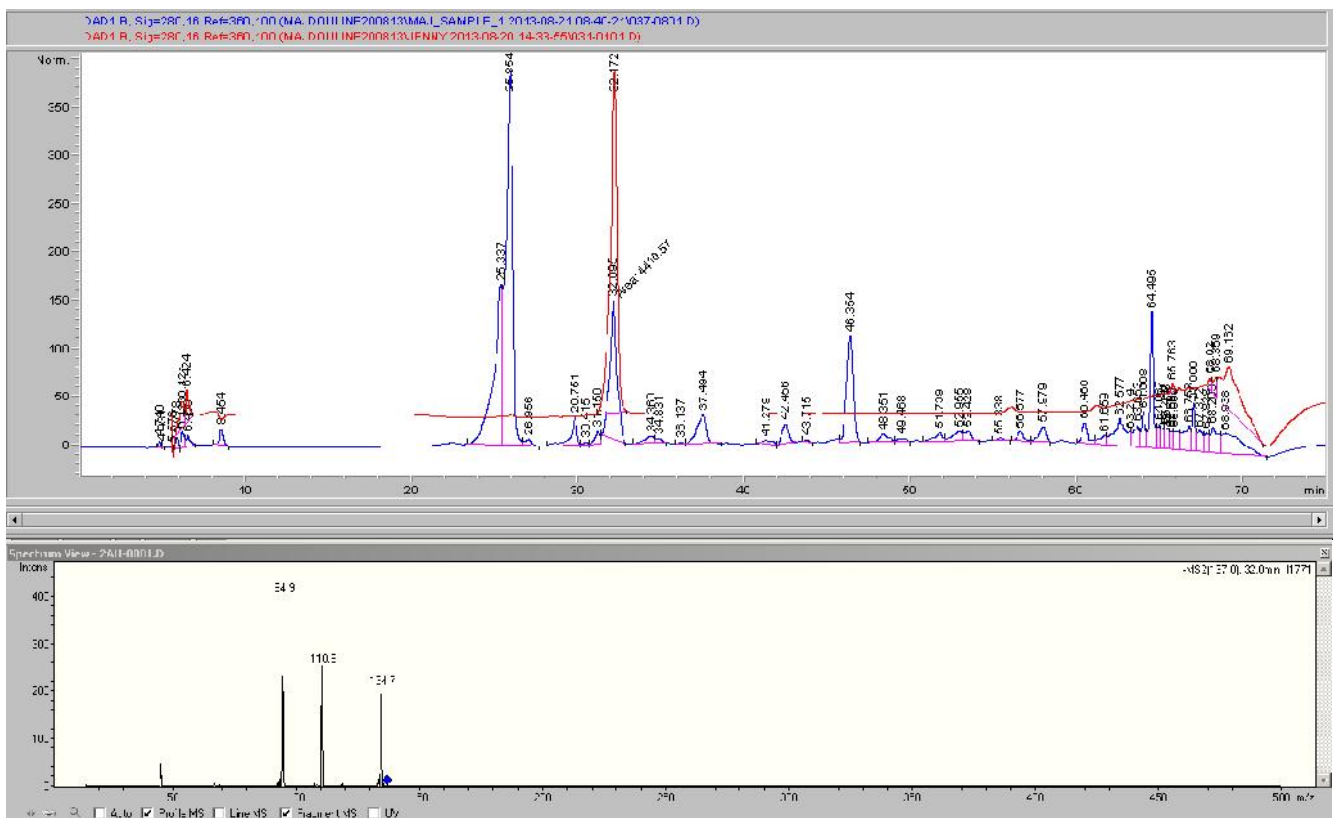

### N\_Oleuropein (area=388.036)

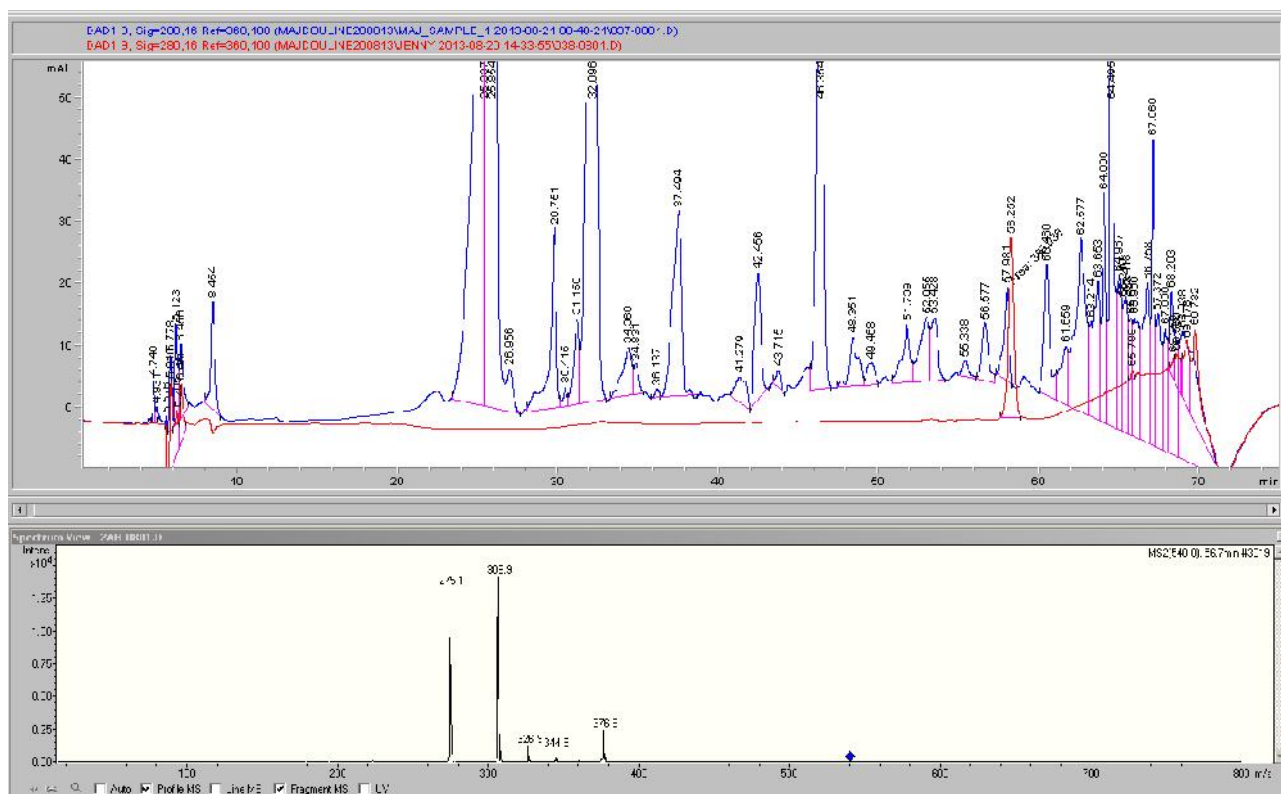

### N\_ferrulic acid (area=14.04, 35.28)



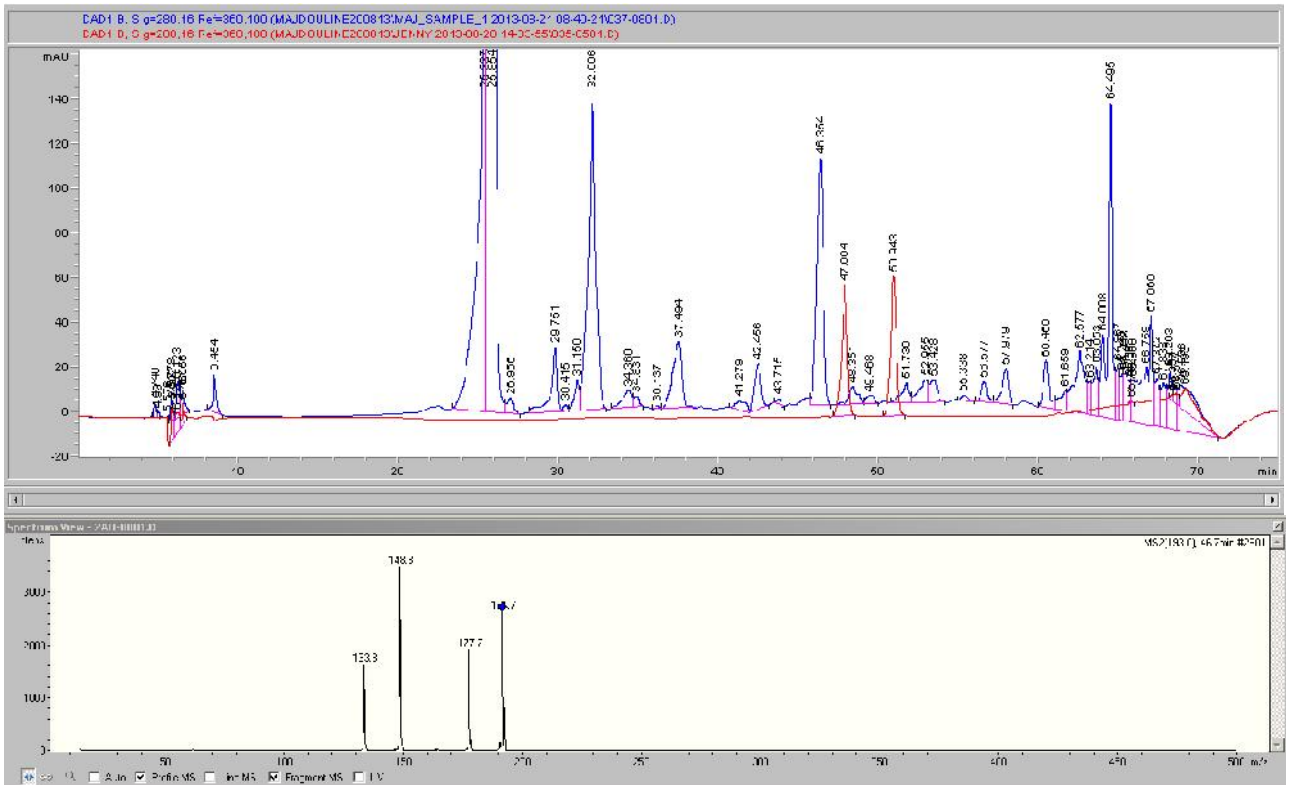

N\_P-coumaric acid (area=222.965)

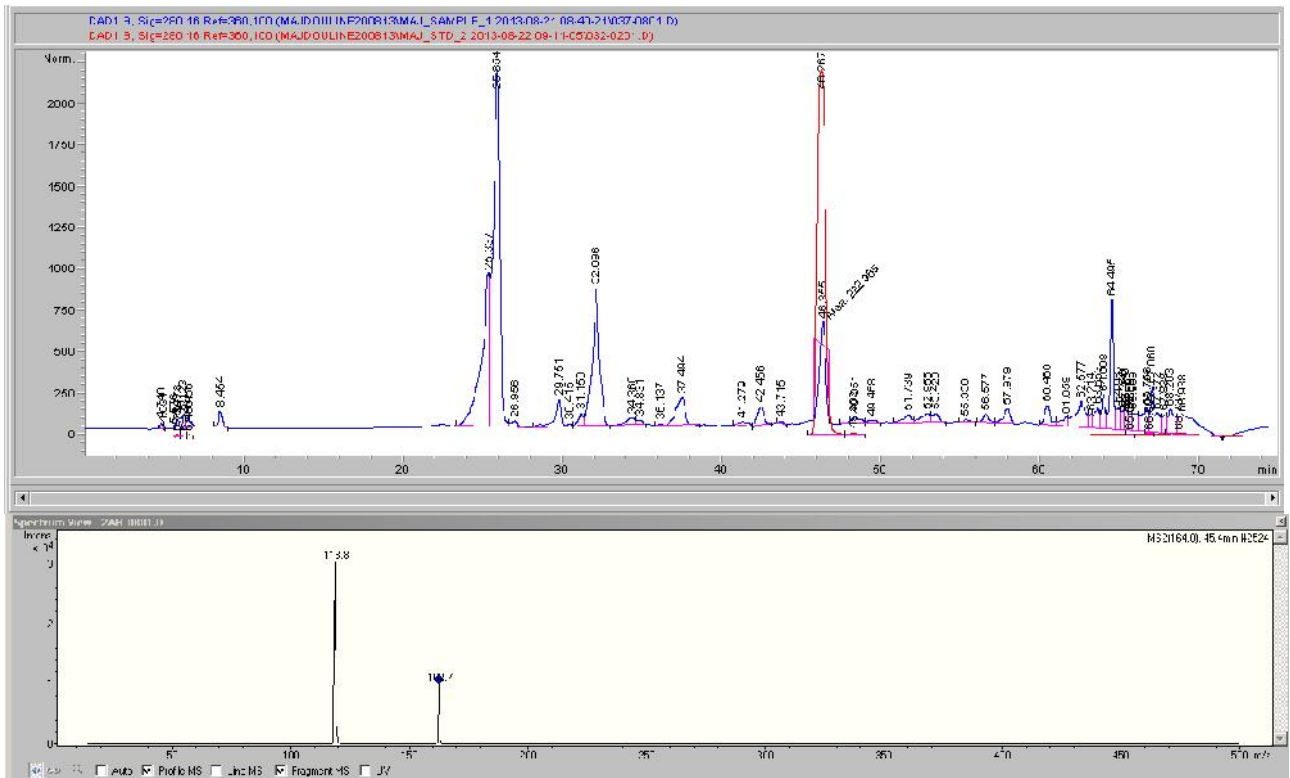

### S1F1\_Tyrosol (area=30.0784)

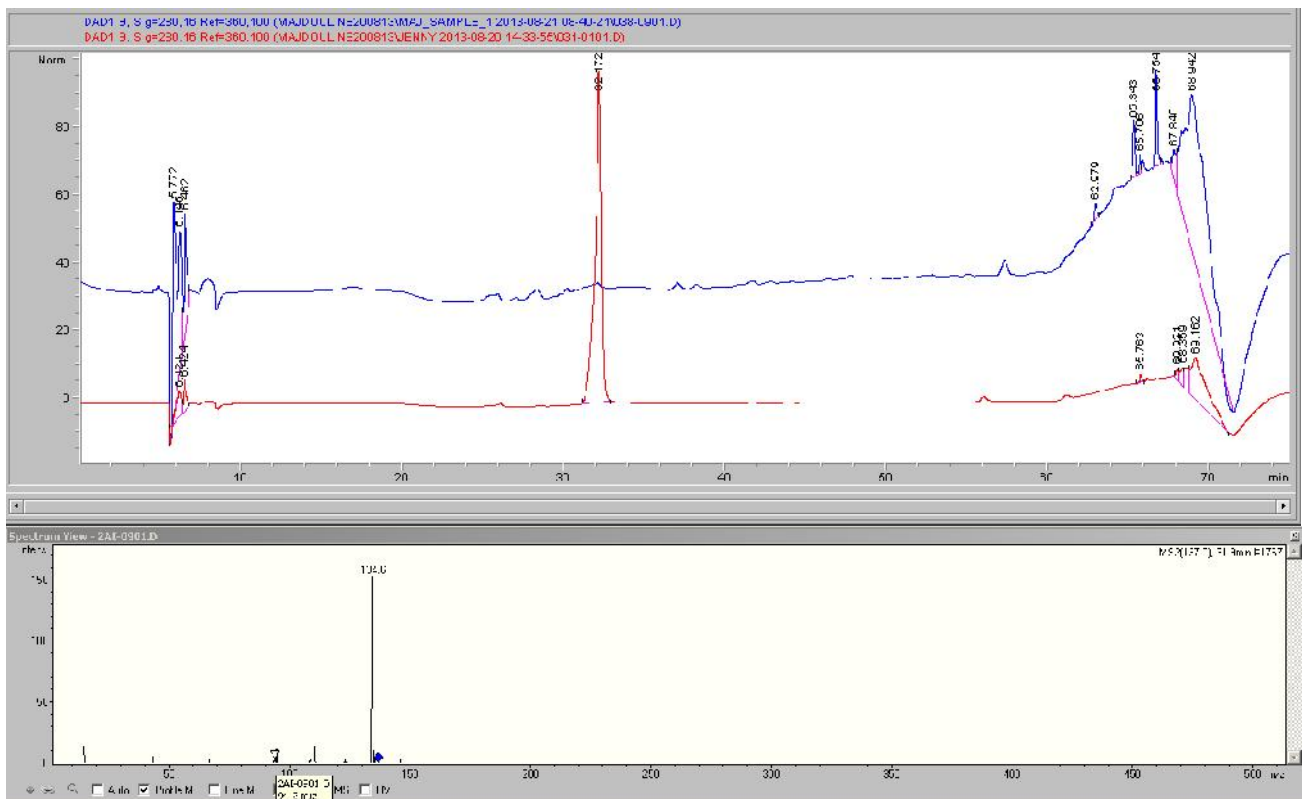

### S1F6\_Hydroxytyrosol (area=1075.7)

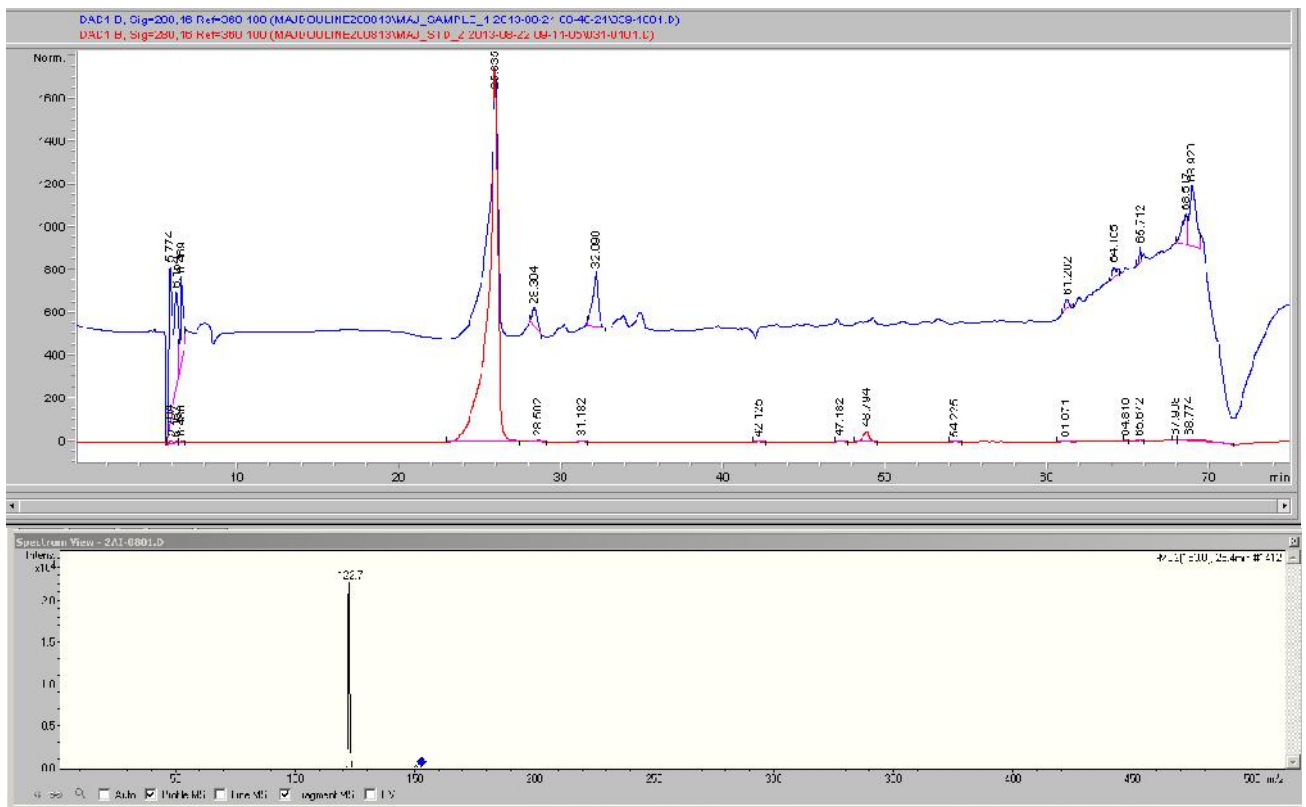

### S1F6\_Oleuropein (area=13.74)

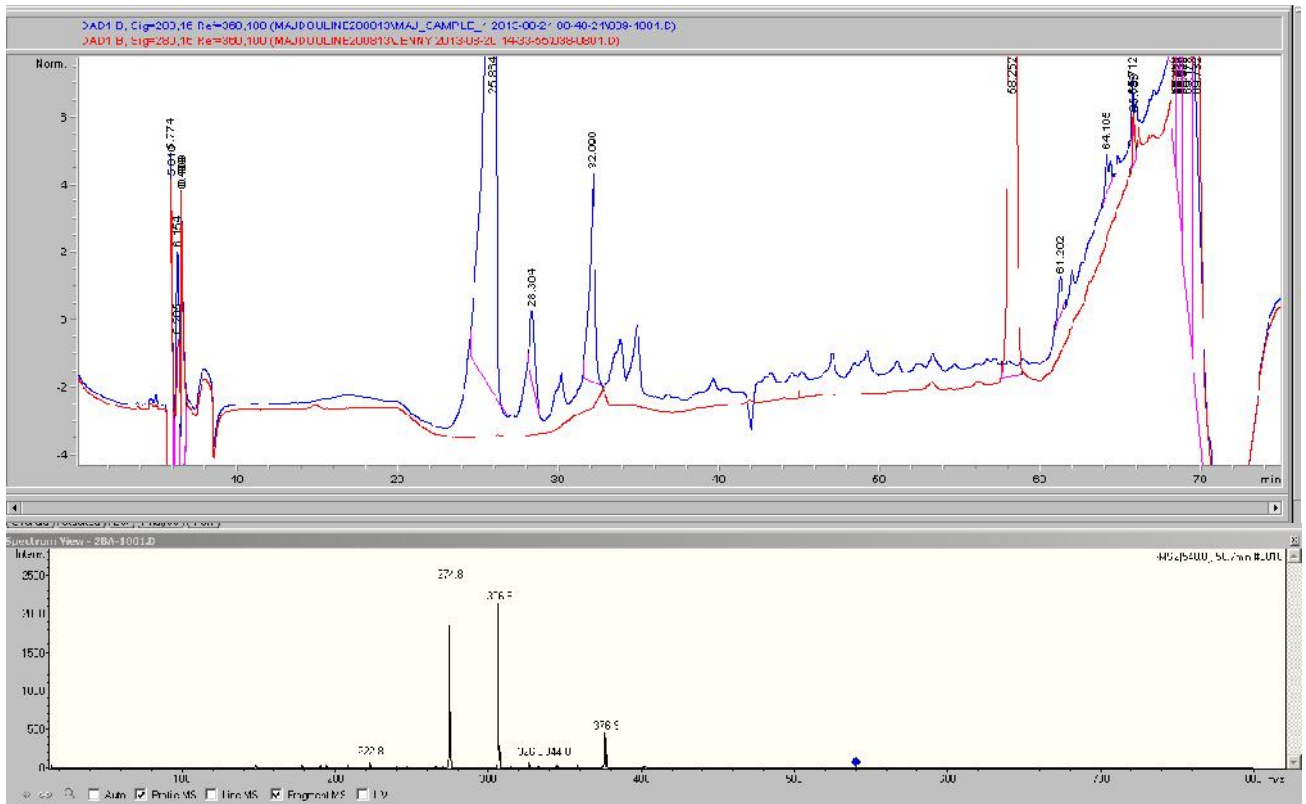

### S1F7\_Hydroxytyrosol (area=2085.74)

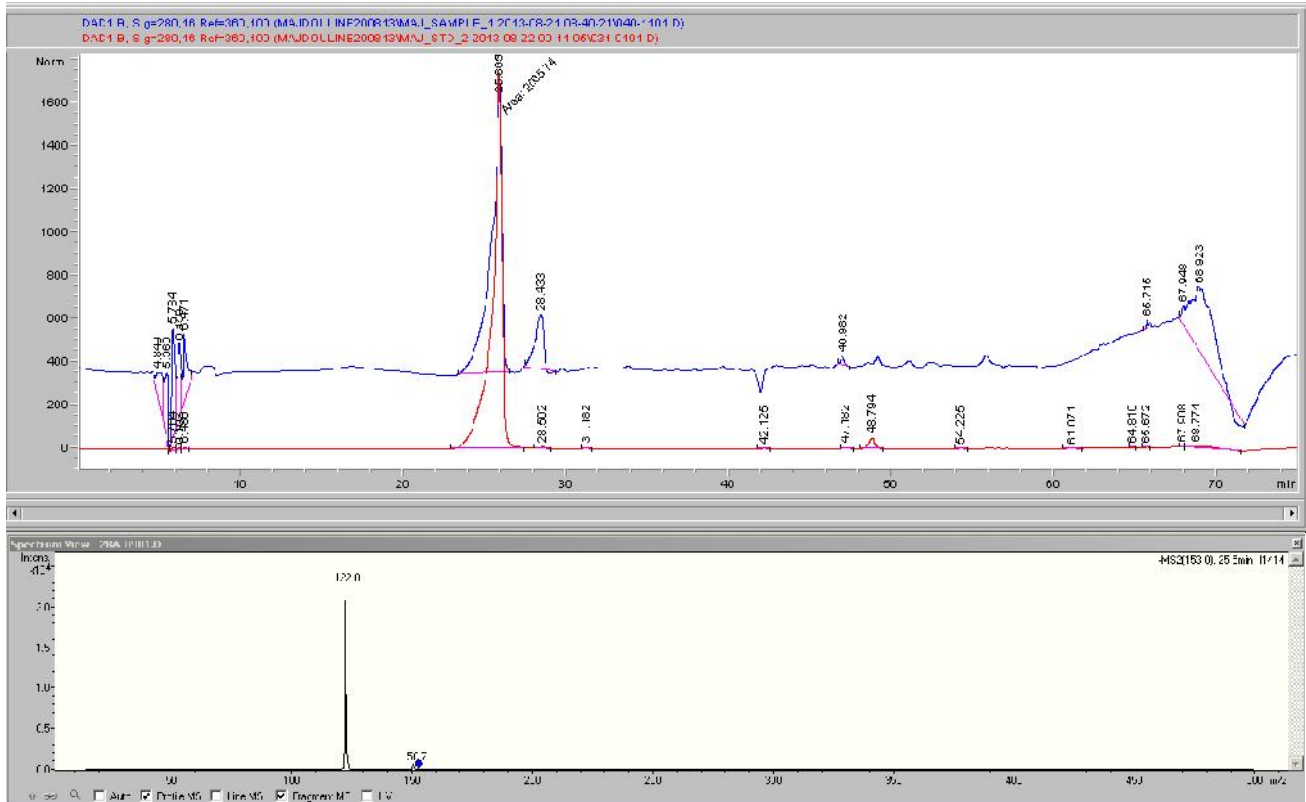

S1F8 = no confirmed compound

S1F9\_oleuropein (area=54.1245)

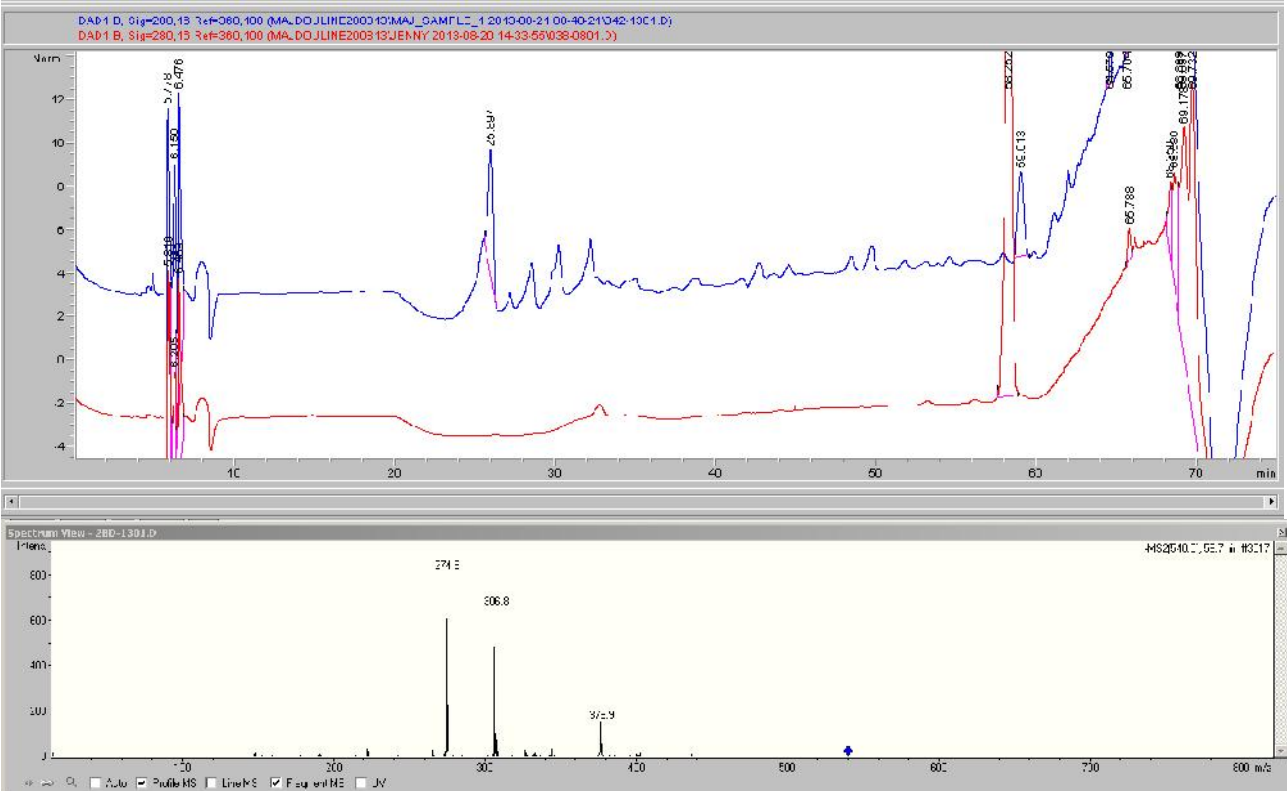

S2F2\_Oleuropein (area=67.5804)

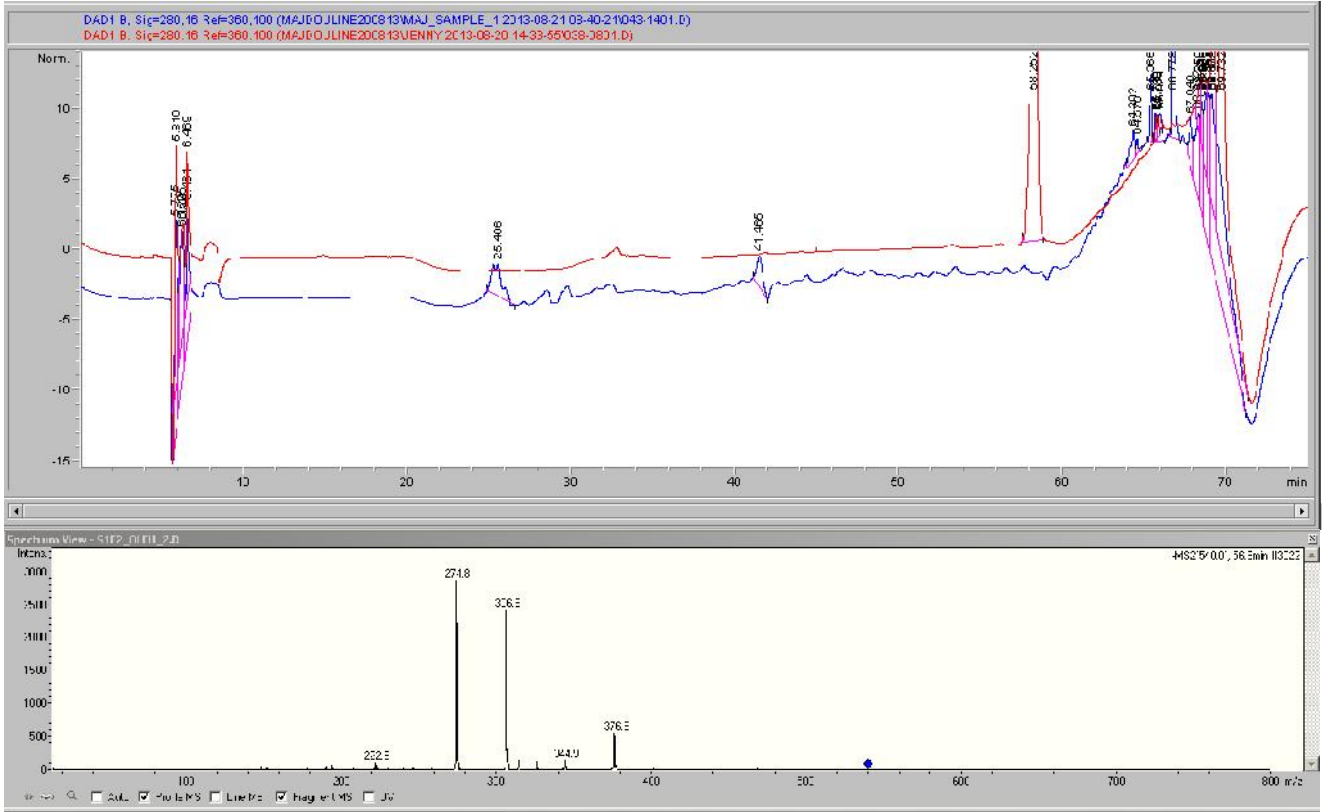

S2F4\_tyrosol (area=39.4247)

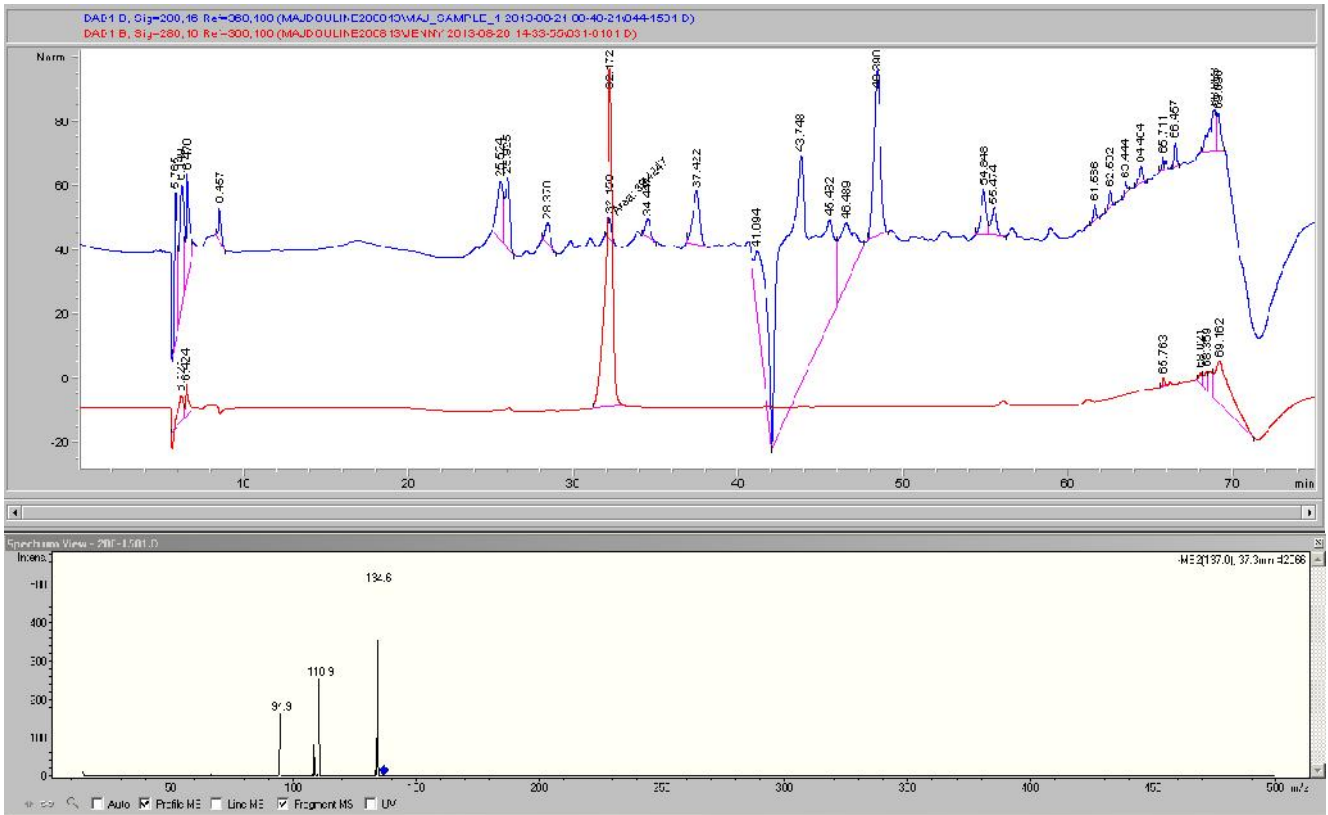

S2F4\_Oleuropein (area=34.78)

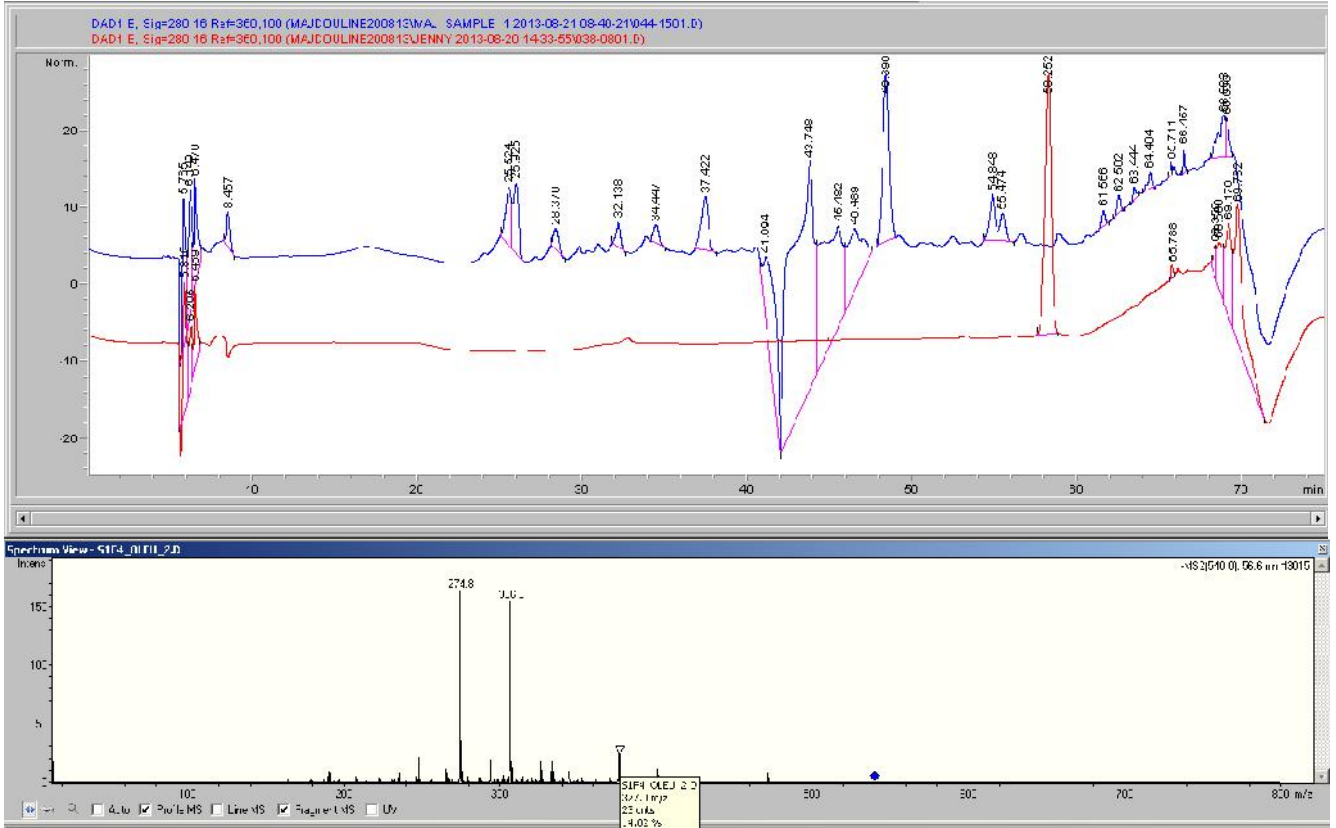

S2F4\_P-coumaric acid (area=45.24)

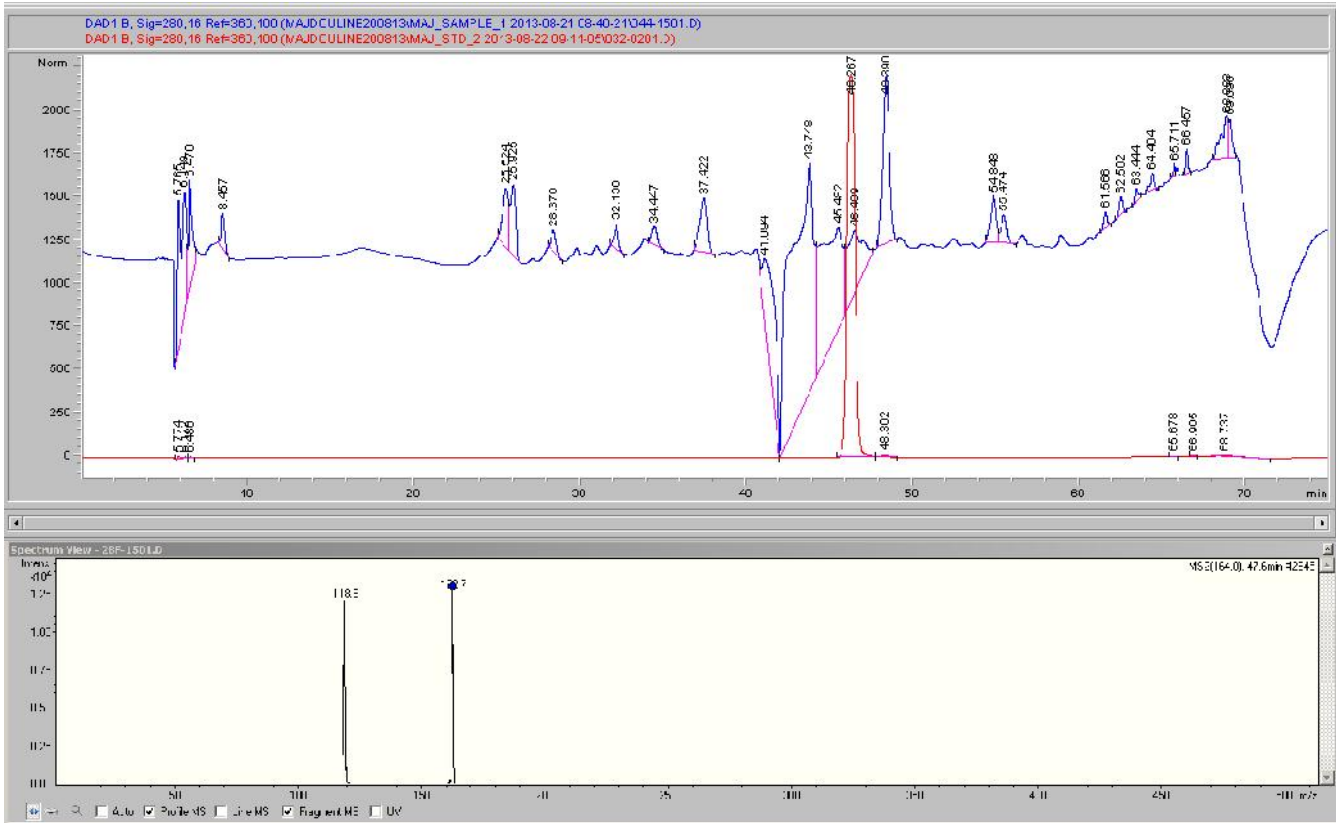

### S2F5\_hydroxytyrosol (area=1805.63)

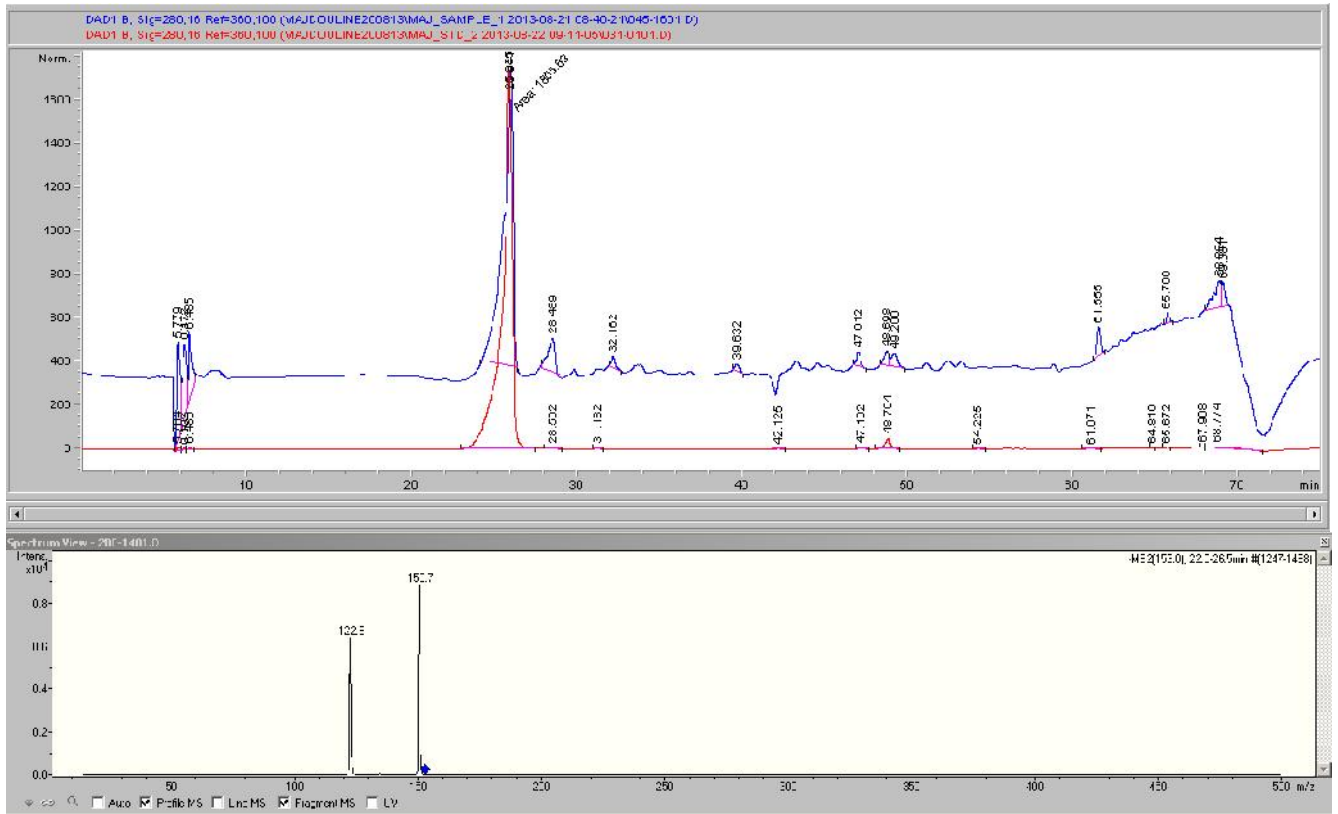

### S2F5\_oleuropein (area=53.03)

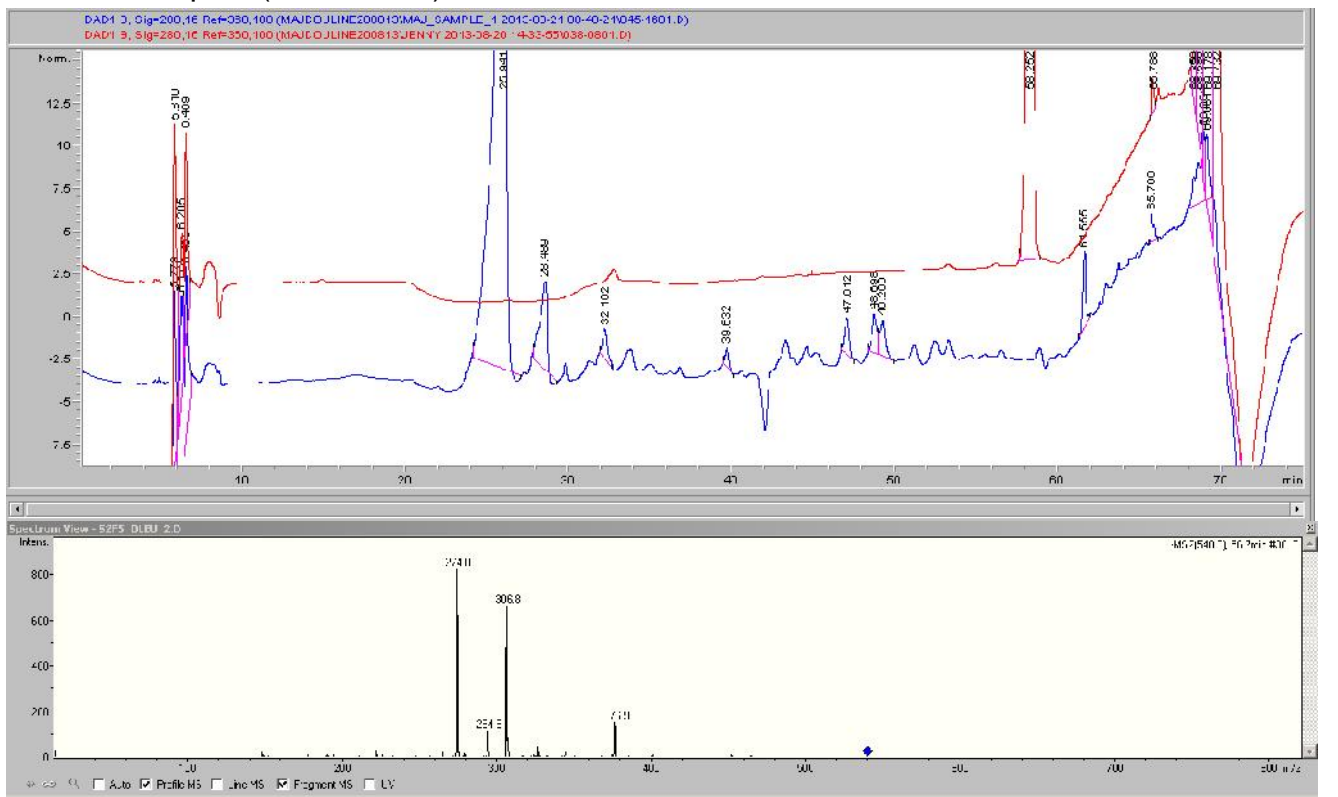

### S2F6\_hydroxytyrosol (area=325.776)

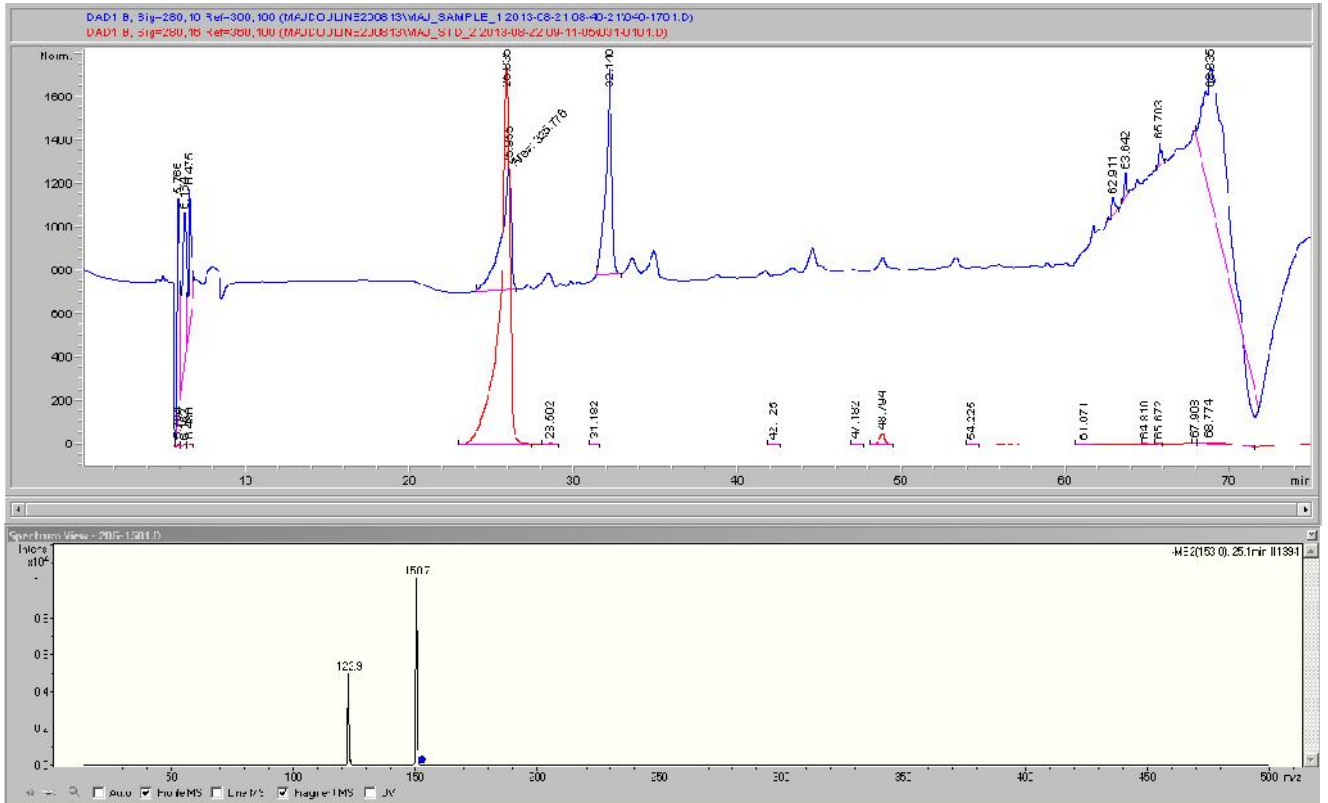

### S2F6\_Tyrosol (area=378.356)

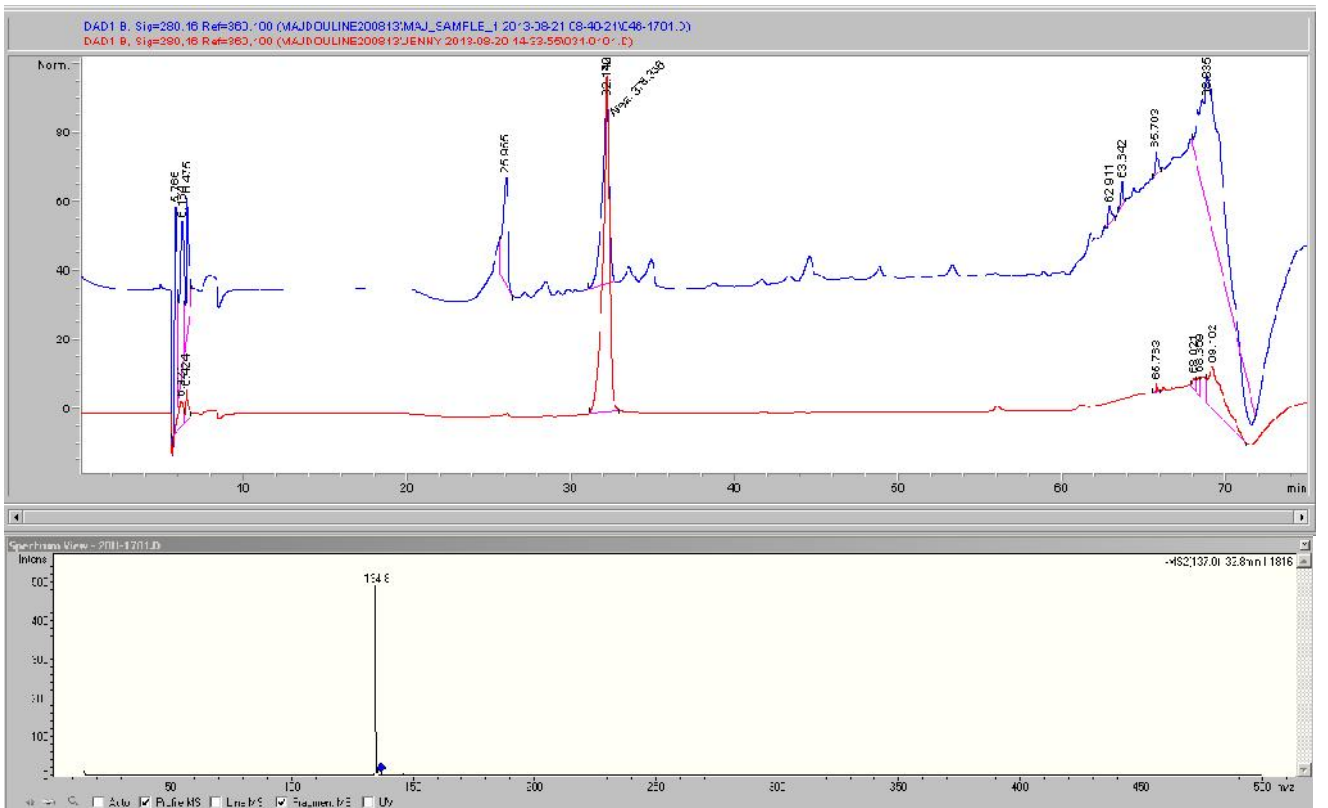



S2F7\_tyrosol (area=1859.39)

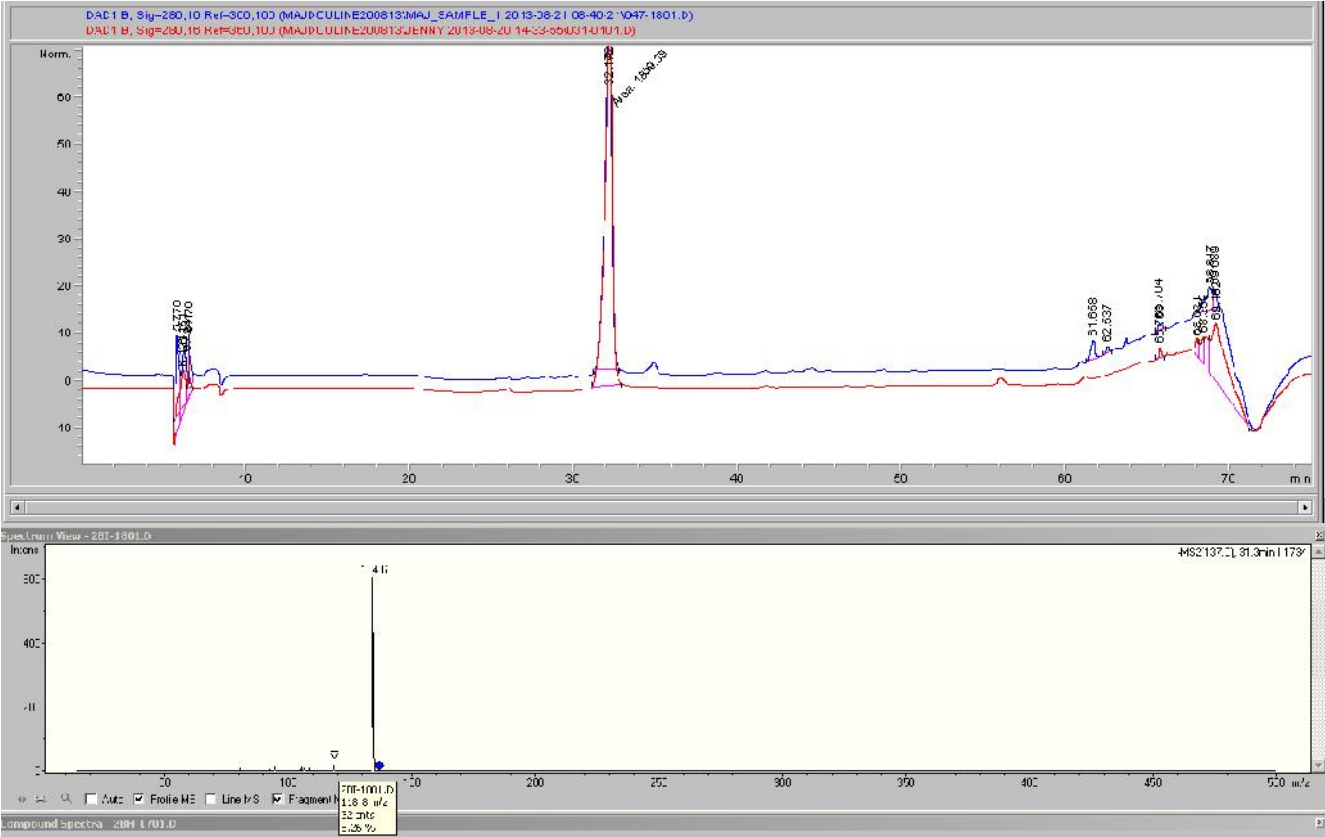

Supplement: pone.0182622.s004.pdf [file pone.0182622.s004.pdf]
