# Supplementary material for: Assessment of the antioxidant and antibacterial activities of different olive processing wastewaters
Source: PubMed Central journal article supplement (PMC5584791; doi:10.1371/journal.pone.0182622), 2017-09-05
Supplement: pone.0182622.s005.pdf [file pone.0182622.s005.pdf]

**S1 Table. Antibacterial activity of OMW phenolic extracts (1mg/disc)**

| Organism                        | Inhibition Zone (mm)* |    |              |         |
|---------------------------------|-----------------------|----|--------------|---------|
|                                 | Tested substances     |    |              |         |
|                                 | PC                    | NC | OMW1         | OMW2    |
| <i>Staphylococcus aureus</i>    | 15 ± 0.5              | -  | 10.66 ± 0.57 | 8 ± 0.5 |
| <i>Bacillus subtilis</i>        | 16.66 ± 0.57          | -  | 8 ± 0.5      | 7 ± 0.5 |
| <i>Echerichia coli</i>          | 15.66 ± 1.15          | -  | 7.5 ± 0.7    | -       |
| <i>Salmonella thyphimurium</i>  | 16 ± 0.5              | -  | 7.5 ± 0.7    | -       |
| <i>Lactobacillus lactis</i>     | 17 ± 0.57             | -  | 7 ± 0.05     | -       |
| <i>Listiria innocua</i>         | 18 ± 0.5              | -  | -            | -       |
| <i>Lactobacillus balgaricus</i> | 23.33 ± 2.5           | -  | 11 ± 1.73    | 9 ± 0.5 |

Diameter of zone of inhibition (mm) including diameter of 6 mm disc; Results quoted as the average of a minimum of six measurements ± standard deviation; “-“ indicates no visible zone of inhibition. PC: positive control; NC: negative control; OMW1: phenolic extract of OMW from semi-modern three-phase process; OMW2: phenolic extract of OMW from modern three-phase process.
