# Supplementary material for: Assessment of the antioxidant and antibacterial activities of different olive processing wastewaters
Source: PubMed Central journal article supplement (PMC5584791; doi:10.1371/journal.pone.0182622), 2017-09-05
Supplement: pone.0182622.s006.pdf [file pone.0182622.s006.pdf]

**S2 Table. TLC data of OMW1 phenolic extract using different solvent ratios**

| Solvent System                          | Ratio       | Concentration (mg/mL) | Number of bands | Rf Values     |
|-----------------------------------------|-------------|-----------------------|-----------------|---------------|
| Hexane/Acetone                          | 4:6         | 10                    | 2               | 2.4;5.2       |
|                                         |             | 25                    | 2               | 3.3; 5        |
| Chloroform/Methanol                     | 10:1        | 10                    | 2               | 2.2; 4.4      |
|                                         |             | 25                    | 3               | 3.2; 4.4; 5.7 |
| Chloroform/Methanol                     | 9:1         | 10                    | 3               | 2.2;4;5.4     |
|                                         |             | 25                    | 3               | 2.8;3.4; 5.4  |
| Chloroform/Methanol                     | 4:1         | 10                    | 2               | 4.1; 5.2      |
|                                         |             | 25                    | 2               | 4.5; 5.4      |
| Chloroform/Methanol                     | 8:2         | 10                    | 2               | 4.5; 5.4      |
|                                         |             | 25                    | 1               | 5.5           |
| Chloroform/Ethyl Acetate                | 1:1         | 10                    | 2               | 1; 4          |
|                                         |             | 25                    | 2               | 2; 4          |
| Hexane/Chloroform/Acetone               | 4:2:4       | 10                    | 1               | 1.7           |
|                                         |             | 25                    | 2               | 3; 4.8        |
| Chloroform/Dichlorobenzene/Acetone      | 5:4.5:0.5   | 10                    | 1               | 0.9           |
|                                         |             | 25                    | 1               | 1.2           |
| Hexane/Dichlorobenzene/Acetone/Methanol | 4:4:1.5:0.5 | 10                    | 2               | 1.3; 2.6      |
|                                         |             | 25                    | 2               | 1.3; 3        |
