# Supplementary material for: Assessment of the antioxidant and antibacterial activities of different olive processing wastewaters
Source: PubMed Central journal article supplement (PMC5584791; doi:10.1371/journal.pone.0182622), 2017-09-05
Supplement: pone.0182622.s007.pdf [file pone.0182622.s007.pdf]

**S3 Table. Summary results of the possible polyphenols from different olive processing wastewaters extracts as identified by HPLC analysis.**

| <b>Sample</b> | <b>Retention time</b> | <b>Suspected compound</b> | <b>Area from HPLC</b> | <b>Concentration (µg/mg of extract)</b> |
|---------------|-----------------------|---------------------------|-----------------------|-----------------------------------------|
| OMW1          | 25.335                | Hydroxytyrosol            | 23514.1               | 52.8                                    |
|               | 32.187                | Tyrosol                   | 2351.8                | 6.88                                    |
|               | 45.267                | <i>p</i> -coumaric acid   | 72.4                  | 0.16                                    |
|               | 58.189                | Oleuropein                | 562.3                 | 31.36                                   |
| OMW2          | 25.835                | Hydroxytyrosol            | 15222.8               | 34.32                                   |
|               | 32.161                | Tyrosol                   | 1194.2                | 3.48                                    |
|               | 48.858                | Ferrulic acid derivative  | 1855.9                | 5.72                                    |
|               | 52.022                | Ferrulic acid             | 131.7                 | 0.48                                    |
|               | 58.064                | Oleuropein                | 132.8                 | 7.4                                     |
|               | 46.267                | <i>p</i> -coumaric acid   | 613.0                 | 2.72                                    |
| GTOW          | 25.895                | Hydroxytyrosol            | 74211.3               | 83.6                                    |
|               | 32.172                | Tyrosol                   | 5939.1                | 8.7                                     |
|               | 58.425                | Oleuropein                | 23.8                  | 0.66                                    |
| PTOW          | 25.835                | Hydroxytyrosol            | 43125.4               | 48.6                                    |
|               | 32.094                | Tyrosol                   | 2209.0                | 3.24                                    |
|               | 46.473                | <i>p</i> -coumaric acid   | 282.3                 | 0.32                                    |
|               | 57.968                | Oleuropein                | 1750.8                | 48.8                                    |
| BTOW          | 25.868                | Hydroxytyrosol            | 9663.5                | 10.9                                    |
|               | 32.093                | Tyrosol                   | 4410.6                | 6.46                                    |
|               | 57.981                | Oleuropein                | 388.0                 | 10.82                                   |
|               | 47.884                | Ferrulic acid derivative  | 14.0                  | 0.02                                    |
|               | 51.739                | Ferrulic acid             | 35.3                  | 0.06                                    |
|               | 46.355                | <i>p</i> - coumaric acid  | 223.0                 | 0.24                                    |
